# Supplementary material
Source: PubMed Central journal article supplement (PMC2728968)
Supplement: 0904246106_ST1_PDF.pdf [file 0904246106_ST1_PDF.pdf]

| ID    | Chrom | Start     | End       | Gene         | Distance | Gene         | Distance |
|-------|-------|-----------|-----------|--------------|----------|--------------|----------|
| RF 1  | chr1  | 12634842  | 12634968  | NM_172294    | 73783    | NM_177173    | -1230650 |
| RF 2  | chr1  | 13650599  | 13650854  | NM_001011873 | 8252     | NM_145381    | 34620    |
| RF 3  | chr1  | 16145127  | 16145184  | NM_025303    | -73763   | NM_133832    | -49165   |
| RF 4  | chr1  | 31153315  | 31153582  | NM_027637    | -44607   | NM_011200    | 156168   |
| RF 5  | chr1  | 37119972  | 37120126  | NM_009918    | 156133   | NM_018872    | 270939   |
| RF 6  | chr1  | 58449815  | 58449997  | NM_025824    | 164      | NM_001008419 | -114646  |
| RF 7  | chr1  | 59030296  | 59030532  | NM_172656    | 118      | NM_172406    | 73003    |
| RF 8  | chr1  | 63514188  | 63514351  | NM_001081658 | -155236  | NM_011780    | -21711   |
| RF 9  | chr1  | 72078429  | 72078526  | NM_001005423 | -127589  | NM_010233    | 446333   |
| RF 10 | chr1  | 72629716  | 72629948  | NM_018817    | 128      | NM_001045533 | 156031   |
| RF 11 | chr1  | 78534198  | 78534433  | NM_001001981 | 120250   | NM_026713    | -25733   |
| RF 12 | chr1  | 91351152  | 91351357  | NM_178119    | 233      | NM_133816    | -384116  |
| RF 13 | chr1  | 93146758  | 93146960  | NM_026454    | 137      | NM_016894    | -70360   |
| RF 14 | chr1  | 95532224  | 95532412  | NM_016778    | 50046    | NM_021537    | 14897    |
| RF 15 | chr1  | 107011556 | 107011680 | NM_178779    | -164951  | NM_011800    | -346161  |
| RF 16 | chr1  | 108068010 | 108068346 | NM_009741    | -366745  | NM_001122675 | -181028  |
| RF 17 | chr1  | 120285747 | 120285924 | NM_023755    | 238774   | NM_177548    | -113     |
| RF 18 | chr1  | 129999061 | 129999387 | NM_181750    | 821      | NM_027678    | 148299   |
| RF 19 | chr1  | 129999805 | 129999930 | NM_181750    | 77       | NM_027678    | 149043   |
| RF 20 | chr1  | 138036957 | 138037196 | NM_028872    | -73150   | NM_001039472 | -8980    |
| RF 21 | chr1  | 140515735 | 140515933 | NM_001025565 | -206027  | NM_021605    | 134445   |
| RF 22 | chr1  | 152240271 | 152240546 | NM_021400    | -56270   | NM_133780    | -289     |
| RF 23 | chr1  | 155545672 | 155545904 | NM_011267    | 41810    | NM_026380    | -45506   |
| RF 24 | chr1  | 157820709 | 157820835 | NM_144791    | -33201   | NM_001024945 | 195425   |
| RF 25 | chr1  | 158588791 | 158588070 | NM_145413    | -20910   | NM_023141    | 3076     |
| RF 26 | chr1  | 162917418 | 162917689 | NM_080844    | 201      | NM_001024952 | -80877   |
| RF 27 | chr1  | 176662828 | 176662906 | NM_011825    | -101087  | NM_019445    | -230873  |
| RF 28 | chr1  | 178744916 | 178745020 | NM_029756    | 26       | NM_001099637 | 81133    |
| RF 29 | chr1  | 183074242 | 183074556 | NM_030131    | 6819     | NM_026171    | 50689    |
| RF 30 | chr1  | 187186798 | 187186998 | NM_029735    | 175      | NM_011794    | -30761   |
| RF 31 | chr1  | 193082105 | 193082232 | NM_025424    | -48570   | NM_007498    | 87930    |
| RF 32 | chr10 | 5729950   | 5730084   | NM_024261    | -161450  | NM_007956    | 387171   |
| RF 33 | chr10 | 5913918   | 5914249   | NM_025343    | 288      | NM_024261    | 22518    |
| RF 34 | chr10 | 7807047   | 7807338   | NM_177387    | -117503  | NM_138667    | 181111   |
| RF 35 | chr10 | 23831080  | 23831220  | NM_016797    | 38042    | NM_001010831 | 2787     |
| RF 36 | chr10 | 30338037  | 30338416  | NM_001111267 | -27350   | NM_025798    | 10025    |
| RF 37 | chr10 | 34001858  | 34002088  | NM_009433    | 190      | NM_172508    | 130660   |
| RF 38 | chr10 | 41945457  | 41945666  | NM_145743    | -86933   | NM_019740    | 39866    |
| RF 39 | chr10 | 42198147  | 42198411  | NM_017472    | 23712    | NM_145743    | 165757   |
| RF 40 | chr10 | 61142988  | 61143152  | NM_009120    | 80       | NM_026438    | -31620   |
| RF 41 | chr10 | 77875630  | 77875959  | NM_007793    | 12784    | NM_010925    | 12524    |
| RF 42 | chr10 | 79209224  | 79209479  | NM_023304    | 8639     | NM_172551    | 10350    |
| RF 43 | chr10 | 79399676  | 79399803  | NM_175450    | 23220    | NM_007880    | -9860    |
| RF 44 | chr10 | 79733498  | 79733896  | NM_009091    | 21703    | NM_001122604 | -5763    |
| RF 45 | chr10 | 80065539  | 80065706  | NM_001100606 | 85       | NM_145421    | 19141    |
| RF 46 | chr10 | 80142280  | 80142577  | NM_172457    | -5717    | NM_021462    | 14207    |
| RF 47 | chr10 | 80363544  | 80363989  | NM_010722    | -563     | NM_013895    | 1350     |
| RF 48 | chr10 | 80959086  | 80959401  | NM_010102    | -2136    | NM_134009    | 9883     |
| RF 49 | chr10 | 81090100  | 81090404  | NM_027480    | 2191     | NM_181586    | 5569     |
| RF 50 | chr10 | 86168752  | 86169046  | NM_153595    | 6757     | NM_001003910 | -197     |
| RF 51 | chr10 | 99949909  | 99950218  | NM_146009    | 1013     | NM_001033332 | 39092    |
| RF 52 | chr10 | 105278351 | 105278545 | NM_025602    | 183      | NM_207522    | 78047    |
| RF 53 | chr10 | 119645713 | 119645878 | NM_026617    | 168      | NM_028679    | 67004    |
| RF 54 | chr11 | 3863676   | 3863822   | NM_022889    | 301      | NM_015749    | 46594    |
| RF 55 | chr11 | 6376060   | 6376262   | NM_178440    | -30494   | NM_011221    | 1276     |
| RF 56 | chr11 | 7052513   | 7052768   | NM_008341    | 45276    | NM_009622    | -89022   |
| RF 57 | chr11 | 21471742  | 21472088  | NM_145425    | 541      | NM_008618    | 14953    |
| RF 58 | chr11 | 22337598  | 22337757  | NM_153596    | 74687    | NM_153078    | 431768   |
| RF 59 | chr11 | 23565866  | 23565978  | NM_028304    | 109      | NM_001033654 | -193     |
| RF 60 | chr11 | 29072820  | 29072990  | NM_134034    | 175      | NM_027869    | -42070   |
| RF 61 | chr11 | 29448144  | 29448409  | NM_194053    | 144802   | NM_024277    | 2303     |
| RF 62 | chr11 | 34647045  | 34647243  | NM_011412    | 287914   | NM_027411    | 24359    |
| RF 63 | chr11 | 60036340  | 60036430  | NM_001039092 | -3875    | NM_011480    | 23750    |
| RF 64 | chr11 | 61770149  | 61770364  | NM_001029936 | 120449   | NM_019921    | 85341    |
| RF 65 | chr11 | 65601730  | 65601922  | NM_026107    | 19015    | NM_009157    | 99985    |
| RF 66 | chr11 | 69209187  | 69209368  | NM_030083    | 105      | NM_001045525 | 2074     |
| RF 67 | chr11 | 69209465  | 69209712  | NM_025915    | -555     | NM_030083    | -173     |

|        |       |           |           |              |          |              |         |
|--------|-------|-----------|-----------|--------------|----------|--------------|---------|
| RF 68  | chr11 | 69808998  | 69809358  | NM_030064    | 280      | NM_019749    | -4125   |
| RF 69  | chr11 | 77795077  | 77795587  | NM_174852    | 1240     | NM_021286    | -50633  |
| RF 70  | chr11 | 78349812  | 78350033  | NM_018854    | 125      | NM_009395    | 13461   |
| RF 71  | chr11 | 88816675  | 88816887  | NM_016706    | 18573    | NM_029023    | 31342   |
| RF 72  | chr11 | 88829523  | 88830063  | NM_016706    | 5725     | NM_029023    | 44190   |
| RF 73  | chr11 | 95528115  | 95528306  | NM_008831    | 188      | NM_033217    | 97976   |
| RF 74  | chr11 | 98543791  | 98544019  | NM_009439    | 76       | NM_021347    | -18127  |
| RF 75  | chr11 | 100406816 | 100406951 | NM_028918    | 129      | NM_134037    | 69147   |
| RF 76  | chr11 | 101303444 | 101303674 | NM_011289    | 284      | NM_172566    | -17046  |
| RF 77  | chr11 | 106344218 | 106344494 | NM_198292    | -19234   | NM_023913    | 85285   |
| RF 78  | chr11 | 106474269 | 106474530 | NM_008816    | -41262   | NM_198292    | 110817  |
| RF 79  | chr11 | 106860942 | 106861125 | NM_176850    | -33452   | NM_010655    | 11000   |
| RF 80  | chr11 | 115891400 | 115891676 | NM_172569    | 235      | NM_008211    | 8126    |
| RF 81  | chr11 | 117847991 | 117848261 | NM_133757    | 179      | NM_007707    | 20591   |
| RF 82  | chr11 | 120534028 | 120534451 | NM_026877    | 323      | NM_175263    | 18910   |
| RF 83  | chr11 | 120683980 | 120684172 | NM_027745    | -3875    | NM_007988    | 16709   |
| RF 84  | chr12 | 4233967   | 4234057   | NM_010881    | -15485   | NM_134046    | 22296   |
| RF 85  | chr12 | 16587301  | 16587838  | NM_008747    | 72974    | NM_172950    | 44827   |
| RF 86  | chr12 | 53072292  | 53072502  | NM_029545    | -26201   | NM_177171    | 95433   |
| RF 87  | chr12 | 71335495  | 71335624  | NM_053167    | -10028   | NM_133198    | 43698   |
| RF 88  | chr12 | 73389371  | 73389572  | NM_030070    | 153548   | NM_001007596 | 76633   |
| RF 89  | chr12 | 77938594  | 77938800  | NM_008558    | -99661   | NM_145927    | -141    |
| RF 90  | chr12 | 78602987  | 78603155  | NM_172952    | 724733   | NM_016893    | -262980 |
| RF 91  | chr12 | 79962735  | 79962818  | NM_026114    | 323      | NM_023721    | 18767   |
| RF 92  | chr12 | 81790438  | 81790480  | NM_001008423 | -65995   | NM_007951    | 55429   |
| RF 93  | chr12 | 82032375  | 82032557  | NM_009159    | 14115    | NM_178682    | -140830 |
| RF 94  | chr12 | 88067413  | 88067607  | NM_145836    | -154237  | NM_144524    | 25962   |
| RF 95  | chr12 | 93087637  | 93087909  | NM_201518    | 3842826  | NM_011344    | 43155   |
| RF 96  | chr12 | 105344153 | 105344351 | NM_173024    | 22052    | NM_172953    | -4831   |
| RF 97  | chr12 | 111829736 | 111830057 | NM_030238    | 9868     | NM_001081457 | -105788 |
| RF 98  | chr12 | 117519203 | 117519682 | NM_028731    | 491      | NM_146039    | 73681   |
| RF 99  | chr13 | 14046733  | 14046902  | NM_178640    | 207      | NM_010317    | -169928 |
| RF 100 | chr13 | 31065883  | 31066065  | NM_001013788 | 149      | NM_153072    | 27171   |
| RF 101 | chr13 | 34826474  | 34826716  | NM_013830    | 140888   | NM_025831    | 106765  |
| RF 102 | chr13 | 36051524  | 36051981  | NM_201358    | -19141   | NM_145938    | 64552   |
| RF 103 | chr13 | 36055523  | 36055781  | NM_201358    | -15142   | NM_145938    | 68551   |
| RF 104 | chr13 | 39515743  | 39515791  | NM_001122948 | -1295300 | NM_134060    | 491735  |
| RF 105 | chr13 | 43327979  | 43328126  | NM_178848    | 138105   | NM_001033399 | 37092   |
| RF 106 | chr13 | 46823128  | 46823574  | NM_010617    | -21328   | NM_175749    | 47658   |
| RF 107 | chr13 | 56804389  | 56804539  | NM_008541    | 78       | NM_009369    | -93426  |
| RF 108 | chr13 | 59015604  | 59015855  | NM_023328    | -535291  | NM_001025074 | -106411 |
| RF 109 | chr13 | 67710517  | 67710704  | NM_183146    | -7420    | NM_183145    | 64627   |
| RF 110 | chr13 | 69716421  | 69716545  | NM_145354    | 34700    | NM_175283    | 4095    |
| RF 111 | chr13 | 114408678 | 114408960 | NM_019960    | -44425   | NM_130796    | 26288   |
| RF 112 | chr14 | 11993397  | 11993599  | NM_008981    | 392669   | NM_010210    | 1610790 |
| RF 113 | chr14 | 20643106  | 20643276  | NM_001038637 | -48674   | NM_026528    | 12483   |
| RF 114 | chr14 | 21113730  | 21113963  | NM_026341    | 181      | NM_021542    | 154451  |
| RF 115 | chr14 | 21208102  | 21208233  | NM_025440    | -2350    | NM_134081    | 4243    |
| RF 116 | chr14 | 32644044  | 32644245  | NM_030166    | 198244   | NM_001024604 | 130844  |
| RF 117 | chr14 | 46008494  | 46008670  | NM_146054    | -69972   | NM_019425    | 12399   |
| RF 118 | chr14 | 60233127  | 60233204  | NM_145463    | 11017    | NM_027986    | 50315   |
| RF 119 | chr14 | 65271196  | 65271407  | NM_001081177 | 171      | NM_026322    | 529735  |
| RF 120 | chr14 | 69887486  | 69888047  | NM_173420    | -20968   | NM_026331    | 27579   |
| RF 121 | chr14 | 76244690  | 76245151  | NM_009429    | 447      | NM_026232    | 82885   |
| RF 122 | chr14 | 78936616  | 78936746  | NM_001081336 | -32799   | NM_011613    | 259364  |
| RF 123 | chr14 | 120876901 | 120877209 | NM_029519    | 781      | NM_207515    | -202011 |
| RF 124 | chr14 | 121246425 | 121246658 | NM_023579    | 63990    | NM_029519    | -368743 |
| RF 125 | chr15 | 3414900   | 3415164   | NM_134099    | -500562  | NM_001048147 | 137376  |
| RF 126 | chr15 | 9070075   | 9070426   | NM_177178    | 250      | NM_145468    | 28334   |
| RF 127 | chr15 | 43114203  | 43114412  | NM_025736    | 194571   | NM_008388    | 32618   |
| RF 128 | chr15 | 44259301  | 44259684  | NM_175009    | 355      | NM_026149    | 52529   |
| RF 129 | chr15 | 75207211  | 75207678  | NM_001039720 | -50824   | NM_008530    | -108361 |
| RF 130 | chr15 | 75900103  | 75900354  | NM_133691    | -510     | NM_134089    | 22488   |
| RF 131 | chr15 | 76029134  | 76029312  | NM_023168    | 48102    | NM_201387    | 27729   |
| RF 132 | chr15 | 81560213  | 81560749  | NM_001081016 | 15064    | NM_011241    | 25531   |
| RF 133 | chr15 | 82176269  | 82176515  | NM_026914    | 206      | NM_177391    | -4633   |
| RF 134 | chr15 | 98493310  | 98493495  | NM_172612    | -6325    | NM_001080981 | 17373   |
| RF 135 | chr15 | 98593520  | 98593724  | NM_011718    | -8672    | NM_175232    | 2952    |

|        |       |           |           |              |           |              |         |
|--------|-------|-----------|-----------|--------------|-----------|--------------|---------|
| RF 136 | chr15 | 100446010 | 100446147 | NM_011873    | 82        | NM_010127    | 40262   |
| RF 137 | chr15 | 102552503 | 102552792 | NM_010464    | 199058    | NM_026192    | 15294   |
| RF 138 | chr16 | 16358997  | 16359269  | NM_139232    | -63073    | NM_152816    | 46672   |
| RF 139 | chr16 | 18248725  | 18249054  | NM_008307    | 250       | NM_011239    | 8654    |
| RF 140 | chr16 | 20535337  | 20535568  | NM_009679    | 239       | NM_007889    | -18201  |
| RF 141 | chr16 | 23294489  | 23294690  | NM_001004151 | 134716    | NM_145933    | -69655  |
| RF 142 | chr16 | 23972241  | 23972436  | NM_178665    | 421334    | NM_009744    | 7104    |
| RF 143 | chr16 | 31948489  | 31948664  | NM_026554    | 235       | NM_172822    | -14450  |
| RF 144 | chr16 | 33163552  | 33163708  | NM_176840    | 21604     | NM_172823    | -100946 |
| RF 145 | chr16 | 38562813  | 38562996  | NM_026407    | 158       | NM_172380    | 37550   |
| RF 146 | chr16 | 74623519  | 74623712  | NM_177142    | -917269   | NM_175549    | 730969  |
| RF 147 | chr16 | 75767020  | 75767230  | NM_023380    | -92018    | NM_030201    | 11582   |
| RF 148 | chr16 | 87495982  | 87496327  | NM_144854    | 57592     | NM_009840    | 12413   |
| RF 149 | chr16 | 98183767  | 98183952  | none         | 901816232 | NM_175428    | 15169   |
| RF 150 | chr17 | 15080094  | 15080232  | NM_026451    | 94        | NM_175173    | 124416  |
| RF 151 | chr17 | 23810370  | 23810597  | NM_181821    | 204       | NM_001008425 | 4785    |
| RF 152 | chr17 | 24615887  | 24616058  | NM_027937    | 9840      | NM_175682    | -5059   |
| RF 153 | chr17 | 26122641  | 26122919  | NM_011933    | -95514    | NM_015830    | 26141   |
| RF 154 | chr17 | 27341465  | 27341655  | NM_001013385 | -217867   | NM_146075    | 14921   |
| RF 155 | chr17 | 27976889  | 27977279  | NM_011432    | 142       | NM_001044719 | 88710   |
| RF 156 | chr17 | 29522265  | 29522432  | NM_008842    | 105724    | NM_013710    | -24407  |
| RF 157 | chr17 | 32557761  | 32557941  | NM_177307    | 31906     | NM_021319    | 7717    |
| RF 158 | chr17 | 33961435  | 33961562  | NM_023202    | 123       | NM_016844    | 1441    |
| RF 159 | chr17 | 35258136  | 35258400  | NM_001128597 | 304       | NM_009975    | 4997    |
| RF 160 | chr17 | 46131546  | 46131736  | NM_001110266 | -22396    | NM_026732    | -308226 |
| RF 161 | chr17 | 46297681  | 46297890  | NM_019581    | 338       | NM_025649    | 13344   |
| RF 162 | chr17 | 47147417  | 47147670  | NM_001097623 | 130473    | NM_146078    | 82178   |
| RF 163 | chr17 | 47748355  | 47748587  | NM_020048    | 189       | NM_016859    | 12076   |
| RF 164 | chr17 | 47873818  | 47874072  | NM_011549    | 48874     | NM_025973    | -10028  |
| RF 165 | chr17 | 56857088  | 56857284  | NM_008738    | -33659    | NM_178926    | 3728    |
| RF 166 | chr17 | 85278558  | 85278804  | NM_011151    | 78796     | NM_028233    | 173972  |
| RF 167 | chr17 | 87175987  | 87176142  | NM_029121    | -167461   | NM_010137    | -22784  |
| RF 168 | chr18 | 12961740  | 12961891  | NM_008378    | 169020    | NM_207530    | 47204   |
| RF 169 | chr18 | 60765845  | 60766070  | NM_008306    | -79784    | NM_001109975 | 5986    |
| RF 170 | chr18 | 61714751  | 61714922  | NM_146087    | 484       | NM_177828    | 61304   |
| RF 171 | chr18 | 65382295  | 65382740  | NM_172833    | 208355    | NM_031881    | -199115 |
| RF 172 | chr18 | 75662408  | 75662530  | NM_145356    | 317423    | NM_201354    | 71538   |
| RF 173 | chr18 | 80666581  | 80666966  | NM_198429    | -136362   | NM_026295    | 61884   |
| RF 174 | chr18 | 85120864  | 85121046  | NM_144946    | 1443479   | NM_025969    | 4179    |
| RF 175 | chr19 | 4125788   | 4125946   | NM_025889    | 171       | NM_016666    | 11343   |
| RF 176 | chr19 | 4163090   | 4163467   | NM_178650    | -21266    | NM_021485    | 6114    |
| RF 177 | chr19 | 5107048   | 5107171   | NM_008451    | -697      | NM_029576    | 7842    |
| RF 178 | chr19 | 5295528   | 5295666   | NM_001024717 | 2812      | NM_030109    | 21597   |
| RF 179 | chr19 | 5425046   | 5425258   | NM_134149    | 110       | NM_024176    | 2223    |
| RF 180 | chr19 | 5849444   | 5849600   | NM_026169    | -1529     | NM_023912    | 91018   |
| RF 181 | chr19 | 5850006   | 5850129   | NM_026169    | -967      | NM_023912    | 91580   |
| RF 182 | chr19 | 6057812   | 6057981   | NM_007990    | 136       | NM_026246    | 4183    |
| RF 183 | chr19 | 6235861   | 6235969   | NM_194348    | 5806      | NM_198168    | 8095    |
| RF 184 | chr19 | 8810216   | 8810318   | NM_134139    | 112       | NM_008577    | 28845   |
| RF 185 | chr19 | 8945927   | 8946234   | NM_146093    | 121       | NM_001013019 | -20653  |
| RF 186 | chr19 | 34570948  | 34571242  | NM_008332    | 54235     | NM_021460    | 4143    |
| RF 187 | chr19 | 41176743  | 41176789  | NM_133352    | -108588   | NM_011904    | 18273   |
| RF 188 | chr19 | 42593181  | 42593309  | NM_177464    | 113       | NM_145123    | 235655  |
| RF 189 | chr19 | 43856497  | 43856813  | NM_013806    | 300       | NM_025530    | -28985  |
| RF 190 | chr19 | 44490695  | 44491010  | NM_011720    | 77267     | NM_009127    | 21751   |
| RF 191 | chr19 | 45437920  | 45438199  | NM_009771    | 303       | NM_010691    | 129703  |
| RF 192 | chr19 | 46776637  | 46776693  | NM_020577    | 5295      | NM_025563    | -12242  |
| RF 193 | chr19 | 53403592  | 53403836  | NM_010847    | 310       | NM_001008542 | -18597  |
| RF 194 | chr19 | 54018990  | 54019207  | NM_019658    | 379       | NM_011050    | -52270  |
| RF 195 | chr19 | 55214081  | 55214253  | NM_009348    | 41293     | NM_008149    | 69858   |
| RF 196 | chr19 | 55270302  | 55270389  | NM_001081076 | -2288     | NM_009348    | -14928  |
| RF 197 | chr19 | 56453568  | 56453692  | NM_007611    | 18050     | NM_198059    | 59037   |
| RF 198 | chr2  | 22599181  | 22599393  | NM_019456    | 30665     | NM_008078    | -121335 |
| RF 199 | chr2  | 25188053  | 25188220  | NM_001029983 | 222       | NM_008169    | 40287   |
| RF 200 | chr2  | 26766211  | 26766422  | NM_013721    | 115       | NM_011513    | 5425    |
| RF 201 | chr2  | 27297930  | 27298048  | NM_001113574 | -3170     | NM_009500    | 178776  |
| RF 202 | chr2  | 32264045  | 32264151  | NM_146118    | -5961     | NM_133783    | -12268  |
| RF 203 | chr2  | 32382999  | 32383377  | NM_153560    | 7879      | NM_194335    | -77023  |

|        |      |           |           |              |          |              |         |
|--------|------|-----------|-----------|--------------|----------|--------------|---------|
| RF 204 | chr2 | 32612662  | 32612825  | NM_152800    | 128      | NM_013781    | -36071  |
| RF 205 | chr2 | 39081667  | 39082089  | NM_053011    | -1370625 | NM_024209    | 29350   |
| RF 206 | chr2 | 69723631  | 69723760  | NM_001081548 | 11671    | NM_029280    | 14380   |
| RF 207 | chr2 | 71049547  | 71049807  | NM_010064    | 522      | NM_028593    | -93437  |
| RF 208 | chr2 | 71711855  | 71712173  | NM_019688    | 107488   | NM_172665    | -527    |
| RF 209 | chr2 | 73749334  | 73749551  | NM_001110209 | -603559  | NM_175015    | 2828    |
| RF 210 | chr2 | 77784258  | 77784561  | NM_177843    | 293445   | NM_030560    | 50549   |
| RF 211 | chr2 | 84555929  | 84556083  | NM_133840    | -7349    | NM_144887    | 27803   |
| RF 212 | chr2 | 84567397  | 84567714  | NM_001005342 | 6963     | NM_133840    | 4119    |
| RF 213 | chr2 | 91105317  | 91105477  | NM_023854    | 145      | NM_028733    | -7832   |
| RF 214 | chr2 | 91570174  | 91570317  | NM_172669    | 120      | NM_178724    | -19068  |
| RF 215 | chr2 | 101726309 | 101726452 | NM_029635    | 109      | NM_001083810 | 171868  |
| RF 216 | chr2 | 118370144 | 118370268 | NM_009773    | 53802    | NM_138313    | 15652   |
| RF 217 | chr2 | 120389581 | 120389774 | NM_009222    | 3825     | NM_011743    | 57016   |
| RF 218 | chr2 | 126834357 | 126834493 | NM_175550    | 89       | NM_023220    | 114490  |
| RF 219 | chr2 | 127997932 | 127998332 | NM_008569    | -440509  | NM_009754    | -46159  |
| RF 220 | chr2 | 144284958 | 144285130 | NM_172859    | -11334   | NM_181417    | -90188  |
| RF 221 | chr2 | 145692157 | 145692208 | NM_026425    | 36847    | NM_028724    | -80275  |
| RF 222 | chr2 | 147133596 | 147133789 | NM_008780    | 57133    | NM_010919    | 124709  |
| RF 223 | chr2 | 152052219 | 152052456 | NM_007788    | 356      | NM_009328    | -82875  |
| RF 224 | chr2 | 153116999 | 153117161 | NM_008444    | 165      | NM_001039055 | -33782  |
| RF 225 | chr2 | 154482535 | 154482903 | NM_029362    | 226      | NM_199304    | -43432  |
| RF 226 | chr2 | 155343227 | 155343627 | NM_019811    | 551      | NM_144786    | 27107   |
| RF 227 | chr2 | 155418400 | 155418558 | NM_001085378 | 18547    | NM_008180    | 29482   |
| RF 228 | chr2 | 166821734 | 166821983 | NM_153065    | 19078    | NM_011490    | 48093   |
| RF 229 | chr2 | 167459936 | 167460086 | NM_145538    | -8788    | NM_023230    | 26798   |
| RF 230 | chr3 | 8758146   | 8758297   | NM_025434    | -44007   | NM_010423    | 94788   |
| RF 231 | chr3 | 9520598   | 9520720   | NM_053182    | -171299  | NM_133218    | 93589   |
| RF 232 | chr3 | 10440285  | 10440487  | NM_178631    | 3031396  | NM_001127191 | 22469   |
| RF 233 | chr3 | 19063186  | 19063400  | NM_026182    | 25057    | NM_028840    | 31043   |
| RF 234 | chr3 | 33698975  | 33699218  | NM_027619    | 141      | NM_021483    | 849442  |
| RF 235 | chr3 | 78892448  | 78892617  | NM_026352    | 502862   | NM_001099624 | 25998   |
| RF 236 | chr3 | 82161781  | 82161929  | NM_001081230 | 212      | NM_021896    | 265433  |
| RF 237 | chr3 | 87689330  | 87689909  | NM_008231    | 20912    | NM_033573    | 26495   |
| RF 238 | chr3 | 88356762  | 88357103  | NM_033526    | 875      | NM_031248    | 3022    |
| RF 239 | chr3 | 89097567  | 89097720  | NM_010108    | -21305   | NM_010107    | 21910   |
| RF 240 | chr3 | 89195843  | 89195964  | NM_020517    | -9078    | NM_009565    | 14276   |
| RF 241 | chr3 | 94386438  | 94386761  | NM_011656    | -30242   | NM_001082484 | 81837   |
| RF 242 | chr3 | 94914861  | 94914961  | NM_009336    | 102      | NM_008847    | 51342   |
| RF 243 | chr3 | 95697726  | 95697853  | NM_146104    | 192      | NM_153513    | 8831    |
| RF 244 | chr3 | 96531397  | 96531703  | NM_026406    | 136      | NM_028925    | 15580   |
| RF 245 | chr3 | 97462070  | 97462308  | NM_182997    | 64       | NM_010232    | -29273  |
| RF 246 | chr3 | 97818035  | 97818160  | NM_027665    | 146699   | NM_010928    | -575    |
| RF 247 | chr3 | 105490278 | 105490509 | NM_175398    | 17316    | NM_017397    | 8899    |
| RF 248 | chr3 | 108365312 | 108365559 | NM_025444    | 9304     | NM_026198    | 5968    |
| RF 249 | chr3 | 137806234 | 137806488 | NM_175389    | 267      | NM_008642    | 52385   |
| RF 250 | chr3 | 145506931 | 145507145 | NM_009740    | 80410    | NM_026993    | -85241  |
| RF 251 | chr3 | 152059341 | 152059716 | NM_198416    | 316      | NM_001080755 | -368    |
| RF 252 | chr4 | 32648761  | 32648946  | NM_010289    | -39078   | NM_001109661 | -144352 |
| RF 253 | chr4 | 33335596  | 33335808  | NM_011884    | 61689    | NM_001033225 | 3199    |
| RF 254 | chr4 | 40705006  | 40705095  | NM_022305    | -46628   | NM_021535    | 20856   |
| RF 255 | chr4 | 44085530  | 44085841  | NM_001038993 | -53554   | NM_015828    | 35832   |
| RF 256 | chr4 | 45309873  | 45310034  | NM_027266    | 166      | NM_001081172 | -112096 |
| RF 257 | chr4 | 46663058  | 46663200  | NM_001081141 | -13711   | NM_198664    | 45797   |
| RF 258 | chr4 | 49572856  | 49573108  | NM_025944    | -24521   | NM_144903    | 23990   |
| RF 259 | chr4 | 55256117  | 55256336  | NM_009011    | 106796   | NM_172867    | -295301 |
| RF 260 | chr4 | 62186090  | 62186291  | NM_177607    | 312      | NM_021498    | 1256    |
| RF 261 | chr4 | 79650348  | 79650416  | NM_031202    | 829785   | NM_011211    | 4063206 |
| RF 262 | chr4 | 86336278  | 86336426  | NM_001081014 | 58180    | NM_007408    | 33810   |
| RF 263 | chr4 | 94269865  | 94269988  | NM_026319    | 11345    | NM_001081019 | -9525   |
| RF 264 | chr4 | 94645738  | 94645847  | NM_010591    | -69988   | NM_177239    | 37007   |
| RF 265 | chr4 | 107040312 | 107040468 | NM_028355    | 76       | NM_145550    | -53277  |
| RF 266 | chr4 | 108506278 | 108506420 | NM_025334    | 1004     | NM_027453    | 19379   |
| RF 267 | chr4 | 108952713 | 108952848 | NM_007943    | 194      | NM_001033226 | -44477  |
| RF 268 | chr4 | 116380886 | 116381270 | NM_026714    | 648      | NM_025962    | 5848    |
| RF 269 | chr4 | 116793050 | 116793345 | NM_175030    | 6367     | NM_008958    | -24090  |
| RF 270 | chr4 | 122959854 | 122959978 | NM_130881    | 299      | NM_013905    | -49056  |
| RF 271 | chr4 | 125773695 | 125774033 | NM_138721    | 300      | NM_172701    | -37887  |

|        |      |           |           |              |         |              |         |
|--------|------|-----------|-----------|--------------|---------|--------------|---------|
| RF 272 | chr4 | 126354761 | 126354927 | NM_011970    | 148     | NM_001013755 | -67652  |
| RF 273 | chr4 | 133310228 | 133310626 | NM_009097    | -92977  | NM_001080819 | 75306   |
| RF 274 | chr4 | 133952109 | 133952415 | NM_133880    | 1276    | NM_019578    | 39822   |
| RF 275 | chr4 | 135841799 | 135842106 | NM_009557    | 184     | NM_011542    | -37903  |
| RF 276 | chr4 | 136604560 | 136604883 | NM_009523    | 228989  | NM_198248    | 68914   |
| RF 277 | chr4 | 137860631 | 137860761 | NM_007838    | 21      | NM_010623    | -42466  |
| RF 278 | chr4 | 138525111 | 138525219 | NM_029857    | 3708    | NM_025786    | -2078   |
| RF 279 | chr4 | 144784773 | 144785048 | NM_011610    | -17497  | NM_001128198 | 219734  |
| RF 280 | chr4 | 147278951 | 147279106 | NM_011122    | -5218   | NM_133201    | 31248   |
| RF 281 | chr4 | 147847490 | 147847533 | NM_001039554 | -21898  | NM_020009    | -24775  |
| RF 282 | chr4 | 148478139 | 148478289 | NM_001025296 | 122     | NM_019781    | 143496  |
| RF 283 | chr4 | 148859489 | 148859648 | NM_023465    | 32862   | NM_026963    | -48     |
| RF 284 | chr4 | 150172466 | 150172736 | NM_133753    | 56733   | NM_173774    | 168962  |
| RF 285 | chr4 | 151699716 | 151699995 | NM_009079    | 270     | NM_001033489 | 18585   |
| RF 286 | chr4 | 154338487 | 154338721 | NM_001113360 | -18747  | NM_172990    | -246    |
| RF 287 | chr4 | 154512162 | 154512313 | NM_011385    | -16021  | NM_001081100 | -51477  |
| RF 288 | chr4 | 154735452 | 154735682 | NM_008072    | -23635  | NM_008860    | 101224  |
| RF 289 | chr4 | 155483865 | 155484152 | NM_145557    | 232     | NM_029264    | 74920   |
| RF 290 | chr5 | 4104638   | 4104840   | NM_001042670 | 87728   | NM_020010    | 23965   |
| RF 291 | chr5 | 5514343   | 5514544   | NM_153116    | -23113  | NM_022890    | 9235    |
| RF 292 | chr5 | 5559523   | 5559664   | NM_172447    | -21458  | NM_153116    | 22067   |
| RF 293 | chr5 | 23929357  | 23929714  | NM_009207    | 1692    | NM_007668    | 5298    |
| RF 294 | chr5 | 28363784  | 28363930  | NM_153526    | 34167   | NM_008314    | -195298 |
| RF 295 | chr5 | 31495359  | 31495705  | NM_153680    | 317     | NM_010122    | 5429    |
| RF 296 | chr5 | 34000369  | 34000880  | NM_001040435 | 426     | NM_026698    | 4505    |
| RF 297 | chr5 | 34083335  | 34083581  | NM_019694    | -665    | NM_008010    | -18963  |
| RF 298 | chr5 | 34678809  | 34678952  | NM_011278    | 229     | NM_001015039 | 141267  |
| RF 299 | chr5 | 34712289  | 34712601  | NM_001030306 | 51210   | NM_011278    | -33251  |
| RF 300 | chr5 | 35002693  | 35003045  | NM_019497    | 334     | NM_029278    | 21509   |
| RF 301 | chr5 | 36873142  | 36873297  | NM_001081232 | -69995  | NM_001113362 | 39890   |
| RF 302 | chr5 | 37052615  | 37052680  | NM_133724    | -85997  | NM_001081232 | 109478  |
| RF 303 | chr5 | 65144668  | 65144781  | NM_008453    | 50093   | NM_019636    | -593219 |
| RF 304 | chr5 | 90653028  | 90653163  | NM_198010    | -3162   | NM_001033310 | 9276    |
| RF 305 | chr5 | 92864081  | 92864302  | NM_007644    | -8817   | NM_183392    | 19516   |
| RF 306 | chr5 | 101103083 | 101103366 | NM_152803    | -5421   | NM_027978    | 19339   |
| RF 307 | chr5 | 114582980 | 114583154 | NM_133904    | 32546   | NM_011677    | -1816   |
| RF 308 | chr5 | 114623112 | 114623171 | NM_148935    | -81060  | NM_133904    | -7586   |
| RF 309 | chr5 | 121995814 | 121996059 | NM_009656    | -21881  | NM_010765    | 20755   |
| RF 310 | chr5 | 125722590 | 125722719 | NM_016741    | -34869  | NM_011424    | 225066  |
| RF 311 | chr5 | 125873354 | 125873641 | NM_203319    | -21419  | NM_019639    | 7020    |
| RF 312 | chr5 | 125889216 | 125889347 | NM_203319    | -5557   | NM_019639    | 22882   |
| RF 313 | chr5 | 125945992 | 125946428 | NM_030210    | 10250   | NM_029752    | -24055  |
| RF 314 | chr5 | 135478335 | 135478576 | NM_145215    | 6833    | NM_009902    | -16252  |
| RF 315 | chr5 | 139936534 | 139936645 | NM_133349    | -10635  | NM_029771    | -37402  |
| RF 316 | chr5 | 140797470 | 140797702 | NM_026510    | -6157   | NM_010752    | 312828  |
| RF 317 | chr5 | 147822863 | 147822914 | NM_080795    | -5367   | NM_029581    | 56766   |
| RF 318 | chr5 | 150439224 | 150439426 | NM_001081204 | 41607   | NM_013559    | 19805   |
| RF 319 | chr5 | 151978608 | 151978909 | NM_001102582 | -385627 | NM_146258    | 138404  |
| RF 320 | chr6 | 13821318  | 13821568  | NM_080464    | -842503 | NM_145066    | 36245   |
| RF 321 | chr6 | 24477548  | 24477630  | NM_080847    | 595     | NM_026614    | 8883    |
| RF 322 | chr6 | 29014577  | 29014623  | NM_133925    | -58995  | NM_008493    | -4357   |
| RF 323 | chr6 | 31349715  | 31349873  | NM_013723    | -119777 | NM_013791    | -888    |
| RF 324 | chr6 | 34126927  | 34127258  | NM_009658    | -127002 | NM_021435    | 21049   |
| RF 325 | chr6 | 39542388  | 39542629  | NM_026612    | 193     | NM_178873    | -18514  |
| RF 326 | chr6 | 56654731  | 56654898  | NM_145958    | -72787  | NM_025520    | 3675    |
| RF 327 | chr6 | 66913007  | 66913214  | NM_007836    | -72082  | NM_025278    | -66558  |
| RF 328 | chr6 | 71186020  | 71186227  | NM_145568    | 35992   | NM_009762    | 20849   |
| RF 329 | chr6 | 72488848  | 72489013  | NM_007599    | 5584    | NM_145569    | 106056  |
| RF 330 | chr6 | 85801217  | 85801366  | NM_053096    | -14198  | NM_023455    | 20837   |
| RF 331 | chr6 | 88468655  | 88469269  | NM_029013    | -98774  | NM_016906    | 15055   |
| RF 332 | chr6 | 92164795  | 92165088  | NM_009426    | -27260  | NM_030081    | 28090   |
| RF 333 | chr6 | 108014847 | 108015091 | NM_145937    | -42174  | NM_008516    | -535069 |
| RF 334 | chr6 | 108609769 | 108609889 | NM_011498    | 853     | NM_010585    | -446680 |
| RF 335 | chr6 | 108779672 | 108779847 | NM_177328    | 1815919 | NM_138677    | -1038   |
| RF 336 | chr6 | 116157899 | 116158125 | NM_026585    | 175     | NM_026376    | 253071  |
| RF 337 | chr6 | 116210650 | 116210806 | NM_001081317 | 3602    | NM_026585    | -52576  |
| RF 338 | chr6 | 117922442 | 117922500 | NM_030165    | -135028 | NM_033648    | 38866   |
| RF 339 | chr6 | 122258523 | 122258721 | NM_010749    | 504     | NM_016970    | 37905   |

|        |      |           |           |              |         |              |          |
|--------|------|-----------|-----------|--------------|---------|--------------|----------|
| RF 340 | chr6 | 124779048 | 124779333 | NM_013538    | 1204    | NM_013700    | 14012    |
| RF 341 | chr6 | 126301124 | 126301168 | NM_145983    | -181444 | NM_008742    | 249695   |
| RF 342 | chr6 | 132413781 | 132413823 | NM_011174    | 106078  | NM_001024705 | 152174   |
| RF 343 | chr6 | 146991280 | 146991451 | NM_145573    | 11      | NM_025620    | -10222   |
| RF 344 | chr6 | 148230584 | 148230632 | NM_001081113 | -488621 | NM_198967    | 49633    |
| RF 345 | chr7 | 3581432   | 3581664   | NM_027328    | 154     | NM_023524    | 9507     |
| RF 346 | chr7 | 4088409   | 4088694   | NM_172736    | 248     | NM_021324    | -17275   |
| RF 347 | chr7 | 4453309   | 4453446   | NM_011618    | -2955   | NM_029834    | 20187    |
| RF 348 | chr7 | 19609491  | 19609766  | NM_031255    | 30551   | NM_008260    | 10860    |
| RF 349 | chr7 | 19945814  | 19945966  | NM_001010836 | 750     | NM_145822    | 3600     |
| RF 350 | chr7 | 19967142  | 19967317  | NM_007949    | 245     | NM_001010836 | -20578   |
| RF 351 | chr7 | 20286514  | 20286630  | NM_001109748 | -147    | NM_009696    | 4922     |
| RF 352 | chr7 | 25337485  | 25337662  | NM_001033205 | -31371  | NM_009532    | -5317    |
| RF 353 | chr7 | 25669447  | 25669669  | NM_023133    | 285     | NM_027732    | -14369   |
| RF 354 | chr7 | 26022789  | 26023359  | NM_010155    | -4789   | NM_001031667 | 9512     |
| RF 355 | chr7 | 29161435  | 29161756  | NM_011756    | -367    | NM_138752    | 16813    |
| RF 356 | chr7 | 29551640  | 29551888  | NM_001122766 | 130     | NM_010908    | 8371     |
| RF 357 | chr7 | 30023294  | 30023699  | NM_029887    | 47      | NM_001033525 | 16348    |
| RF 358 | chr7 | 30553476  | 30553666  | NM_023750    | 94      | NM_029714    | 71239    |
| RF 359 | chr7 | 30875514  | 30875647  | NM_011981    | 4580    | NM_152814    | 13159    |
| RF 360 | chr7 | 31514460  | 31514834  | NM_008085    | -445    | NM_027215    | 1741     |
| RF 361 | chr7 | 35901598  | 35901836  | NM_007678    | 2713    | NM_009884    | 70158    |
| RF 362 | chr7 | 51629114  | 51629695  | NM_016663    | 10381   | NM_009131    | 69491    |
| RF 363 | chr7 | 51639921  | 51640067  | NM_198250    | 57935   | NM_016663    | -426     |
| RF 364 | chr7 | 51723121  | 51723416  | NM_025368    | 304     | NM_026690    | -2317    |
| RF 365 | chr7 | 52777445  | 52777645  | NM_008654    | -844    | NM_001045555 | -8370    |
| RF 366 | chr7 | 52973229  | 52973542  | NM_009077    | 211     | NM_020011    | 7575     |
| RF 367 | chr7 | 53212806  | 53212850  | NM_018795    | -18943  | NM_001033243 | -29039   |
| RF 368 | chr7 | 72948421  | 72948682  | NM_021336    | 257033  | NM_026795    | -110119  |
| RF 369 | chr7 | 73205349  | 73205563  | NM_021336    | 105     | NM_026795    | -367047  |
| RF 370 | chr7 | 73383223  | 73383271  | NM_146191    | -20409  | NM_001081163 | -128823  |
| RF 371 | chr7 | 99709506  | 99709738  | NM_025515    | 533     | NM_011807    | -1470211 |
| RF 372 | chr7 | 104572265 | 104572531 | NM_001012434 | 29448   | NM_009381    | 10799    |
| RF 373 | chr7 | 107854973 | 107855201 | NM_178764    | 242     | NM_013746    | 62564    |
| RF 374 | chr7 | 134119484 | 134119646 | NM_026638    | 378     | NM_144926    | -25242   |
| RF 375 | chr7 | 134655319 | 134655572 | NM_026888    | 61542   | NM_145589    | -40192   |
| RF 376 | chr7 | 134889518 | 134889675 | NM_172748    | 770     | NM_198858    | 27045    |
| RF 377 | chr7 | 134984912 | 134985095 | NM_009294    | 409     | NM_024414    | 34555    |
| RF 378 | chr7 | 135888185 | 135888363 | NM_001029982 | 309     | NM_145955    | 48213    |
| RF 379 | chr7 | 135890717 | 135890936 | NM_001080963 | 509890  | NM_001029982 | -2223    |
| RF 380 | chr7 | 138703543 | 138703700 | NM_009774    | 361     | NM_145998    | -5968    |
| RF 381 | chr8 | 11786165  | 11786243  | NM_029326    | 54355   | NM_017402    | -27836   |
| RF 382 | chr8 | 13159077  | 13159329  | NM_010684    | 57      | NM_146207    | -53357   |
| RF 383 | chr8 | 36635671  | 36635795  | NM_001081279 | 15180   | NM_026067    | 107353   |
| RF 384 | chr8 | 47772297  | 47772481  | NM_008391    | 52801   | NM_009810    | -69495   |
| RF 385 | chr8 | 63471937  | 63472215  | NM_175089    | 79      | NM_173876    | 82752    |
| RF 386 | chr8 | 72566568  | 72566730  | NM_027481    | 143     | NM_028993    | 24088    |
| RF 387 | chr8 | 72826600  | 72826709  | NM_021538    | 83      | NM_001024922 | 9836     |
| RF 388 | chr8 | 87489988  | 87490181  | NM_011563    | 3558    | NM_027187    | 9480     |
| RF 389 | chr8 | 93593867  | 93594016  | NM_011250    | 125     | NM_177224    | -241132  |
| RF 390 | chr8 | 96738300  | 96738568  | NM_172410    | 200     | NM_013602    | -35174   |
| RF 391 | chr8 | 98331964  | 98332123  | NM_172758    | -27858  | NM_178078    | 88614    |
| RF 392 | chr8 | 107115440 | 107115682 | NM_007663    | -22606  | NM_001024606 | -73      |
| RF 393 | chr8 | 107850109 | 107850377 | NM_025486    | 173     | NM_177449    | 13870    |
| RF 394 | chr8 | 108375902 | 108376031 | NM_021513    | 3140    | NM_177150    | 7325     |
| RF 395 | chr8 | 108384379 | 108384693 | NM_026532    | 154     | NM_021513    | -5337    |
| RF 396 | chr8 | 108424273 | 108424591 | NM_173432    | 100     | NM_175024    | -6804    |
| RF 397 | chr8 | 120191274 | 120191568 | NM_008290    | 34571   | NM_028725    | 5976     |
| RF 398 | chr8 | 124473829 | 124474180 | NM_016812    | 603     | NM_007608    | 33786    |
| RF 399 | chr8 | 124474425 | 124474548 | NM_016812    | 7       | NM_007608    | 34382    |
| RF 400 | chr8 | 129259579 | 129260005 | NM_024214    | -198870 | NM_174987    | -313152  |
| RF 401 | chr9 | 3023398   | 3023449   | NM_026303    | 311832  |              | 3023398  |
| RF 402 | chr9 | 25059980  | 25060140  | NM_009859    | 188     | NM_020586    | 147404   |
| RF 403 | chr9 | 42558333  | 42558466  | NM_027144    | -213591 | NM_175481    | 229815   |
| RF 404 | chr9 | 46502617  | 46502617  | NM_207676    | 835894  | NM_146000    | -411446  |
| RF 405 | chr9 | 59334312  | 59334776  | NM_178388    | -32179  | NM_019927    | 97952    |
| RF 406 | chr9 | 60870182  | 60870373  | NM_001083928 | 349990  | NM_028283    | -227828  |
| RF 407 | chr9 | 63897885  | 63898066  | NM_145835    | 67068   | NM_008542    | 96936    |

|        |      |           |           |              |           |              |         |
|--------|------|-----------|-----------|--------------|-----------|--------------|---------|
| RF 408 | chr9 | 65141906  | 65142107  | NM_011802    | 195       | NM_173385    | -28920  |
| RF 409 | chr9 | 65972481  | 65972706  | NM_026635    | 1936      | NM_019727    | 36548   |
| RF 410 | chr9 | 66198132  | 66198260  | NM_175206    | -158133   | NM_010019    | -192100 |
| RF 411 | chr9 | 67867846  | 67867905  | NM_013646    | 633762    | NM_177184    | -179644 |
| RF 412 | chr9 | 71333663  | 71333843  | NM_001033208 | -18490    | NM_178602    | 7413    |
| RF 413 | chr9 | 75257082  | 75257249  | NM_001039522 | 32248     | NM_015806    | 22375   |
| RF 414 | chr9 | 75257667  | 75258062  | NM_001039522 | 31663     | NM_015806    | 22960   |
| RF 415 | chr9 | 77956807  | 77957109  | NM_019987    | 4408      | NM_001081490 | 27502   |
| RF 416 | chr9 | 79641187  | 79641421  | NM_001081243 | -22181    | NM_133718    | 24432   |
| RF 417 | chr9 | 95481489  | 95481712  | NM_029620    | 56557     | NM_198414    | -21254  |
| RF 418 | chr9 | 107435923 | 107436413 | NM_019704    | 352       | NM_020263    | -133713 |
| RF 419 | chr9 | 107775076 | 107775229 | NM_028369    | 15436     | NM_029169    | 99186   |
| RF 420 | chr9 | 108419309 | 108419636 | NM_175143    | 108       | NM_133794    | -8905   |
| RF 421 | chr9 | 117949317 | 117949698 | NM_013727    | 299       | NM_178660    | 1462091 |
| RF 422 | chr9 | 121766185 | 121766261 | NM_021609    | 41396     | NM_001112668 | 7528    |
| RF 423 | chr9 | 123275850 | 123276142 | NM_153168    | 207       | NM_001002267 | 107676  |
| RF 424 | chrX | 72919263  | 72919867  | NM_145629    | -111738   | NM_175122    | 101867  |
| RF 425 | chrY | 1264819   | 1264972   | NM_009571    | -97303    | NM_148943    | 629416  |
| RF 426 | chrY | 2870546   | 2870746   | none         | 997129453 | NM_011253    | -682036 |
