# Supplementary material
Source: PubMed Central journal article supplement (PMC2728968)
Supplement: 0904246106_ST2_PDF.pdf [file 0904246106_ST2_PDF.pdf]

## Table S2 ChIP\_Seq Gene list

The nearest genes to the SREBP-1 binding peaks are listed.

Gene Ontology (GO) analysis was performed using DAVID (<http://david.abcc.ncifcrf.gov>) (5) by examining the biological processes in which nearest genes are involved, using RefSeq mRNA IDs and the entire mouse genome as a background model. *P*-values were calculated using Fisher Exact statistics.

| Gene Symbol   | Description                   | Accession    |
|---------------|-------------------------------|--------------|
|               | 7-Sep SEPTIN 7                | NM_009859    |
| 0610012D14RIK | RIKEN CDNA 0610012D14 GENE    | NM_026690    |
| 0610037D15RIK | RIKEN CDNA 0610037D15 GENE    | NM_026714    |
| 1110007A13RIK | RIKEN CDNA 1110007A13 GENE    | NM_145955    |
| 1110067I12RIK | RIKEN CDNA 1110067I12 GENE    | NM_001013019 |
| 1200004M23RIK | RIKEN CDNA 1200004M23 GENE    | NM_026169    |
| 1300014I06RIK | RIKEN CDNA 1300014I06 GENE    | NM_025831    |
| 1500032L24RIK | RIKEN CDNA 1500032L24 GENE    | NM_026914    |
| 1600012H06RIK | RIKEN CDNA 1600012H06 GENE    | NM_026451    |
| 1700018L24RIK | RIKEN CDNA 1700018L24 GENE    | NM_029326    |
| 1700034H14RIK | RIKEN CDNA 1700034H14 GENE    | NM_025969    |
| 1700052N19RIK | RIKEN CDNA 1700052N19 GENE    | NM_024261    |
| 1700067C01RIK | RIKEN CDNA 1700067C01 GENE    | NM_029714    |
| 1810007P19RIK | RIKEN CDNA 1810007P19 GENE    | NM_172701    |
| 1810063B05RIK | RIKEN CDNA 1810063B05 GENE    | NM_174987    |
| 2010012O05RIK | RIKEN CDNA 2010012O05 GENE    | NM_025563    |
| 2010106G01RIK | RIKEN CDNA 2010106G01 GENE    | NM_023220    |
| 2010200O16RIK | RIKEN CDNA 2010200O16 GENE    | NM_026198    |
| 2210417D09RIK | RIKEN CDNA 2210417D09 GENE    | NM_025620    |
| 2700060E02RIK | RIKEN CDNA 2700060E02 GENE    | NM_026528    |
| 2810432L12RIK | RIKEN CDNA 2810432L12 GENE    | NM_025944    |
| 4632417N05RIK | RIKEN CDNA 4632417N05 GENE    | NM_028725    |
| 4833401D15RIK | RIKEN CDNA 4833401D15 GENE    | NM_175030    |
| 4833426J09RIK | RIKEN CDNA 4833426J09 GENE    | NM_001024606 |
| 4930425N13RIK | RIKEN CDNA 4930425N13 GENE    | NM_178388    |
| 4931428L18RIK | RIKEN CDNA 4931428L18 GENE    | NM_027637    |
| 4933426M11RIK | RIKEN CDNA 4933426M11 GENE    | NM_178682    |
| 4933429F08RIK | RIKEN CDNA 4933429F08 GENE    | NM_177828    |
| 4933430I17RIK | RIKEN CDNA 4933430I17 GENE    | NM_177607    |
| 4933440H19RIK | RIKEN CDNA 4933440H19 GENE    | NM_194335    |
| 5730409E04RIK | RIKEN CDNA 5730409E04RIK GENE | NM_001013755 |
| 5730536A07RIK | RIKEN CDNA 5730536A07 GENE    | NM_026635    |
| 5730559C18RIK | RIKEN CDNA 5730559C18 GENE    | NM_028872    |
| 5830427D03RIK | RIKEN CDNA 5830427D03 GENE    | NM_175232    |
| 6330439K17RIK | RIKEN CDNA 2810039F03 GENE    | NM_172859    |
| 6430527G18RIK | RIKEN CDNA 6430527G18 GENE    | NM_145836    |
| 6530401N04RIK | RIKEN CDNA 4930578F06 GENE    | NM_029545    |
| 6530418L21RIK | RIKEN CDNA 6530418L21 GENE    | NM_175398    |
| 9130404D08RIK | RIKEN CDNA 9130404D08 GENE    | NM_028993    |
| 9430015G10RIK | RIKEN CDNA 9430015G10 GENE    | NM_145557    |
| 9930021D14RIK | RIKEN CDNA 9930021D14 GENE    | NM_175682    |
| A330021E22RIK | RIKEN CDNA A330021E22 GENE    | NM_172447    |
| A530054K11RIK | RIKEN CDNA A530054K11 GENE    | NM_183146    |
| A830018L16RIK | RIKEN CDNA A830018L16 GENE    | NM_177173    |
| AA407270      | EXPRESSED SEQUENCE AA407270   | NM_001033208 |

|          |                                                                                     |              |
|----------|-------------------------------------------------------------------------------------|--------------|
| AACS     | ACETOACETYL-COA SYNTHETASE                                                          | NM_030210    |
| ABCC2    | ATP-BINDING CASSETTE, SUB-FAMILY C (CFTR/MRP), MEMBER 2                             | NM_013806    |
| ABCC6    | ATP-BINDING CASSETTE, SUB-FAMILY C (CFTR/MRP), MEMBER 6                             | NM_018795    |
| ABHD11   | ABHYDROLASE DOMAIN CONTAINING 11                                                    | NM_145215    |
| ACACB    | ACETYL-COENZYME A CARBOXYLASE BETA                                                  | NM_133904    |
| ACLY     | ATP CITRATE LYASE                                                                   | NM_134037    |
| ACSS2    | ACETYL-COA SYNTHETASE                                                               | NM_019811    |
| ADAM23   | A DISINTEGRIN AND METALLOPEPTIDASE DOMAIN 23                                        | NM_011780    |
| ADAM30   | A DISINTEGRIN AND METALLOPEPTIDASE DOMAIN 30                                        | NM_027665    |
| ADCK2    | AARF DOMAIN CONTAINING KINASE 2                                                     | NM_178873    |
| ADCY1    | ADENYLATE CYCLASE 1                                                                 | NM_009622    |
| ADFP     | ADIPOSE DIFFERENTIATION RELATED PROTEIN                                             | NM_007408    |
| AGTPBP1  | ATP/GTP BINDING PROTEIN 1                                                           | NM_023328    |
| AI662250 | EXPRESSED SEQUENCE AI662250                                                         | NM_178926    |
| AI837181 | EXPRESSED SEQUENCE AI837181                                                         | NM_134149    |
| AIP      | ARYL-HYDROCARBON RECEPTOR-INTERACTING PROTEIN                                       | NM_016666    |
| AKAP10   | A KINASE (PKA) ANCHOR PROTEIN 10                                                    | NM_019921    |
| AKR1B3   | ALDO-KETO REDUCTASE FAMILY 1, MEMBER B3 (ALDOSE REDUCTASE)                          | NM_009658    |
| ALDH18A1 | ALDEHYDE DEHYDROGENASE 18 FAMILY, MEMBER A1                                         | NM_011200    |
| ALDH2    | ALDEHYDE DEHYDROGENASE 2, MITOCHONDRIAL                                             | NM_009656    |
| ALDOB    | ALDOLASE 2, B ISOFORM                                                               | NM_144903    |
| ALKBH8   | ALKB, ALKYLATION REPAIR HOMOLOG 8 (E. COLI)                                         | NM_026303    |
| ALS2CR2  | AMYOTROPHIC LATERAL SCLEROSIS 2 (JUVENILE) CHROMOSOME REGION, CANDIDATE 2 (HUMAN)   | NM_172656    |
| ANAPC1   | ANAPHASE PROMOTING COMPLEX SUBUNIT 1                                                | NM_008569    |
| ANGEL1   | ANGEL HOMOLOG 1 (DROSOPHILA)                                                        | NM_144524    |
| ANKRD17  | ANKYRIN REPEAT DOMAIN 17                                                            | NM_198010    |
| ANKRD24  | ANKYRIN REPEAT DOMAIN 24                                                            | NM_027480    |
| ANKRD28  | ANKYRIN REPEAT DOMAIN 28                                                            | NM_001024604 |
| AOX3L1   | ALDEHYDE OXIDASE 3-LIKE 1                                                           | NM_001008419 |
| AP2M1    | ADAPTOR PROTEIN COMPLEX AP-2, MU1                                                   | NM_009679    |
| APBB1IP  | AMYLOID BETA (A4) PRECURSOR PROTEIN-BINDING, FAMILY B, MEMBER 1 INTERACTING PROTEIN | NM_019456    |
| APH1A    | ANTERIOR PHARYNX DEFECTIVE 1A HOMOLOG (C. ELEGANS)                                  | NM_146104    |
| APOE     | APOLIPOPROTEIN E                                                                    | NM_009696    |
| ARHGEF12 | RHO GUANINE NUCLEOTIDE EXCHANGE FACTOR (GEF) 12                                     | NM_027144    |
| ARHGEF7  | RHO GUANINE NUCLEOTIDE EXCHANGE FACTOR (GEF7)                                       | NM_017402    |
| ARID3A   | AT RICH INTERACTIVE DOMAIN 3A (BRIGHT LIKE)                                         | NM_007880    |
| ARIH1    | ARIADNE UBIQUITIN-CONJUGATING ENZYME E2 BINDING PROTEIN HOMOLOG 1 (DROSOPHILA)      | NM_019927    |
| ARMC1    | ARMADILLO REPEAT CONTAINING 1                                                       | NM_028840    |
| AS3MT    | ARSENIC (+3 OXIDATION STATE) METHYLTRANSFERASE                                      | NM_020577    |
| ASB15    | ANKYRIN REPEAT AND SOCS BOX-CONTAINING                                              | NM_080847    |

|               |                                                                                                 |              |
|---------------|-------------------------------------------------------------------------------------------------|--------------|
| ASPSCR1       | PROTEIN 15<br>ALVEOLAR SOFT PART SARCOMA<br>CHROMOSOME REGION, CANDIDATE 1<br>(HUMAN)           | NM_026877    |
| ATF3          | ACTIVATING TRANSCRIPTION FACTOR 3                                                               | NM_007498    |
| ATG2A         | CDNA SEQUENCE BC023754                                                                          | NM_194348    |
| ATP5G3        | ATP SYNTHASE, H+ TRANSPORTING,<br>MITOCHONDRIAL F0 COMPLEX, SUBUNIT C<br>(SUBUNIT 9), ISOFORM 3 | NM_175015    |
| ATP6V1D       | ATPASE, H+ TRANSPORTING, LYSOSOMAL V1<br>SUBUNIT D                                              | NM_023721    |
| ATP6V1E2      | ATPASE, H+ TRANSPORTING, LYSOSOMAL V1<br>SUBUNIT E2                                             | NM_029121    |
| AV249152      | EXPRESSED SEQUENCE AV249152                                                                     | NM_145425    |
| AZI2          | 5-AZACYTIDINE INDUCED GENE 2                                                                    | NM_013727    |
| B3GALNT2      | UDP-GALNAC:BETAGLCNAC BETA 1,3-<br>GALACTOSAMINYLTRANSFERASE,<br>POLYPEPTIDE 2                  | NM_178640    |
| B4GALT1       | UDP-GAL:BETAGLCNAC BETA 1,4-<br>GALACTOSYLTRANSFERASE, POLYPEPTIDE 1                            | NM_022305    |
| B930006L02RIK | RIKEN CDNA B930006L02 GENE                                                                      | NM_178764    |
| BANP          | BTG3 ASSOCIATED NUCLEAR PROTEIN                                                                 | NM_016812    |
| BC003993      | CDNA SEQUENCE BC003993                                                                          | NM_030560    |
| BC028528      | CDNA SEQUENCE BC028528                                                                          | NM_153513    |
| BC030307      | GRP94 NEIGHBORING NUCLEOTIDASE<br>VARIANT 4                                                     | NM_153595    |
| BC031853      | CDNA SEQUENCE BC031853                                                                          | NM_172758    |
| BC037112      | CDNA SEQUENCE BC037112                                                                          | NM_001030306 |
| BC067068      | CDNA SEQUENCE BC067068                                                                          | NM_207522    |
| BCL10         | B-CELL LEUKEMIA/LYMPHOMA 10                                                                     | NM_009740    |
| BCL2          | B-CELL LEUKEMIA/LYMPHOMA 2                                                                      | NM_009741    |
| BCL2L11       | BCL2-LIKE 11 (APOPTOSIS FACILITATOR)                                                            | NM_009754    |
| BCL6          | B-CELL LEUKEMIA/LYMPHOMA 6                                                                      | NM_009744    |
| BHLHB2        | BASIC HELIX-LOOP-HELIX DOMAIN<br>CONTAINING, CLASS B2                                           | NM_011498    |
| BMF           | EXPRESSED SEQUENCE AW260063                                                                     | NM_138313    |
| BOK           | BCL-2-RELATED OVARIAN KILLER PROTEIN                                                            | NM_016778    |
| BPNT1         | BISPHOSPHATE 3'-NUCLEOTIDASE 1                                                                  | NM_011794    |
| BRI3BP        | BRI3 BINDING PROTEIN                                                                            | NM_029752    |
| BTF3L4        | RIKEN CDNA 4632412E09 GENE                                                                      | NM_027453    |
| BTRC          | BETA-TRANSDUCIN REPEAT CONTAINING<br>PROTEIN                                                    | NM_009771    |
| BUB1B         | BUDDING UNINHIBITED BY BENZIMIDAZOLES 1<br>HOMOLOG, BETA (S. CEREVISIAE)                        | NM_009773    |
| BUB3          | BUDDING UNINHIBITED BY BENZIMIDAZOLES 3<br>HOMOLOG (S. CEREVISIAE)                              | NM_009774    |
| BUD13         | RIKEN CDNA D030060M11 GENE                                                                      | NM_146000    |
| BYSL          | BYSTIN-LIKE                                                                                     | NM_016859    |
| BZW1          | BASIC LEUCINE ZIPPER AND W2 DOMAINS 1                                                           | NM_025824    |
| C230093N12RIK | RIKEN CDNA C230093N12 GENE                                                                      | NM_153560    |
| C530043G21RIK | RIKEN CDNA C530043G21 GENE                                                                      | NM_145413    |
| C920005C14RIK | RIKEN CDNA C920005C14 GENE                                                                      | NM_177391    |
| CACNA2D2      | CALCIUM CHANNEL, VOLTAGE-DEPENDENT,<br>ALPHA 2/DELTA SUBUNIT 2                                  | NM_020263    |
| CADM1         | IMMUNOGLOBULIN SUPERFAMILY, MEMBER 4A                                                           | NM_207676    |
| CALCOCO1      | CALCIUM BINDING AND COILED COIL DOMAIN 1                                                        | NM_026192    |
| CALR4         | CALRETICULIN 4                                                                                  | NM_001033226 |
| CAPG          | CAPPING PROTEIN (ACTIN FILAMENT),<br>GELSOLIN-LIKE                                              | NM_007599    |

|         |                                                                                        |              |
|---------|----------------------------------------------------------------------------------------|--------------|
| CAR5A   | CARBONIC ANHYDRASE 5A, MITOCHONDRIAL                                                   | NM_007608    |
| CASKIN1 | RIKEN CDNA 3300002N10 GENE                                                             | NM_027937    |
| CASP3   | CASPASE 3                                                                              | NM_009810    |
| CASP7   | CASPASE 7                                                                              | NM_007611    |
| CCBP2   | CHEMOKINE BINDING PROTEIN 2                                                            | NM_021609    |
| CCDC114 | CDNA SEQUENCE BC013491                                                                 | NM_001033243 |
| CCDC139 | RIKEN CDNA 2810013G11 GENE                                                             | NM_001033654 |
| CCDC139 | RIKEN CDNA 2810013G11 GENE                                                             | NM_028304    |
| CCDC57  | COILED-COIL DOMAIN CONTAINING 57                                                       | NM_027745    |
| CCDC59  | COILED-COIL DOMAIN CONTAINING 59                                                       | NM_025602    |
| CCDC90B | RIKEN CDNA 2310015N07 GENE                                                             | NM_025515    |
| CCDC99  | RIKEN CDNA 2600001J17 GENE                                                             | NM_027411    |
| CCT8    | CHAPERONIN SUBUNIT 8 (THETA)                                                           | NM_009840    |
| CD3EAP  | CD3E ANTIGEN, EPSILON POLYPEPTIDE ASSOCIATED PROTEIN                                   | NM_145822    |
| CDCA3   | CELL DIVISION CYCLE ASSOCIATED 3                                                       | NM_013538    |
| CDH16   | CADHERIN 16                                                                            | NM_007663    |
| CDH20   | CADHERIN 20                                                                            | NM_011800    |
| CDIPT   | CDP-DIACYLGLYCEROL--INOSITOL 3-PHOSPHATIDYLTRANSFERASE (PHOSPHATIDYLINOSITOL SYNTHASE) | NM_026638    |
| CDK5    | CYCLIN-DEPENDENT KINASE 5                                                              | NM_007668    |
| CDK5    | CYCLIN-DEPENDENT KINASE 5                                                              | NM_007668    |
| CEBPA   | CCAAT/ENHANCER BINDING PROTEIN (C/EBP), ALPHA                                          | NM_007678    |
| CEBPG   | CCAAT/ENHANCER BINDING PROTEIN (C/EBP), GAMMA                                          | NM_009884    |
| CENPO   | RIKEN CDNA 2810429O05 GENE                                                             | NM_134046    |
| CENPT   | RIKEN CDNA G630055P03 GENE                                                             | NM_177150    |
| CENTG2  | EXPRESSED SEQUENCE R75364                                                              | NM_178119    |
| CHD9    | CHROMODOMAIN HELICASE DNA BINDING PROTEIN 9                                            | NM_177224    |
| CHMP4B  | CHROMATIN MODIFYING PROTEIN 4B                                                         | NM_029362    |
| CILP    | CARTILAGE INTERMEDIATE LAYER PROTEIN, NUCLEOTIDE PYROPHOSPHOHYDROLASE                  | NM_173385    |
| CLCN3   | CHLORIDE CHANNEL 3                                                                     | NM_173876    |
| CLDN12  | CLAUDIN 12                                                                             | NM_022890    |
| CLDN3   | CLAUDIN 3                                                                              | NM_009902    |
| CLEC11A | C-TYPE LECTIN DOMAIN FAMILY 11, MEMBER A                                               | NM_009131    |
| CLP1    | EXPRESSED SEQUENCE AI462438                                                            | NM_133840    |
| CLPX    | CASEINOLYTIC PROTEASE X (E.COLI)                                                       | NM_011802    |
| CML2    | CAMELLO-LIKE 2                                                                         | NM_053096    |
| CML4    | CAMELLO-LIKE 4                                                                         | NM_023455    |
| CNGA3   | CYCLIC NUCLEOTIDE GATED CHANNEL ALPHA 3                                                | NM_009918    |
| CNIH4   | RIKEN CDNA D530030D03 GENE                                                             | NM_030131    |
| CNO     | RIKEN CDNA 2610101N07 GENE                                                             | NM_133724    |
| COIL    | COILIN                                                                                 | NM_016706    |
| COMMD9  | COMM DOMAIN CONTAINING 9                                                               | NM_029635    |
| COPE    | COATOMER PROTEIN COMPLEX, SUBUNIT EPSILON                                              | NM_021538    |
| COQ2    | COENZYME Q2 HOMOLOG, PRENYLTRANSFERASE (YEAST)                                         | NM_027978    |
| COX18   | CDNA SEQUENCE BC038311                                                                 | NM_001033310 |
| CRTAC1  | CARTILAGE ACIDIC PROTEIN 1                                                             | NM_145123    |
| CSNK1A1 | CASEIN KINASE I-ALPHA                                                                  | NM_146087    |
| CSNK2A1 | CASEIN KINASE II, ALPHA 1 POLYPEPTIDE                                                  | NM_007788    |
| CSNK2B  | CASEIN KINASE II, BETA SUBUNIT                                                         | NM_009975    |
| CSRP2BP | CYSTEINE AND GLYCINE-RICH PROTEIN 2                                                    | NM_181417    |

|               |                                                                                        |              |
|---------------|----------------------------------------------------------------------------------------|--------------|
|               | BINDING PROTEIN                                                                        |              |
| CSTB          | CYSTATIN B                                                                             | NM_007793    |
| CTDP1         | CTD (CARBOXY-TERMINAL DOMAIN, RNA POLYMERASE II, POLYPEPTIDE A) PHOSPHATASE, SUBUNIT 1 | NM_026295    |
| CTF2          | CARDIOTROPHIN 2                                                                        | NM_198858    |
| CTNNBIP1      | CATENIN BETA INTERACTING PROTEIN 1                                                     | NM_023465    |
| CUL4A         | RIKEN CDNA 2810470J21 GENE                                                             | NM_146207    |
| CUTC          | CUTC COPPER TRANSPORTER HOMOLOG (E.COLI)                                               | NM_025530    |
| CYP4F39       | RIKEN CDNA 4732474A20 GENE                                                             | NM_177307    |
| CYP51         | CYTOCHROME P450, FAMILY 51                                                             | NM_020010    |
| D030051N19RIK | RIKEN CDNA D030051N19 GENE                                                             | NM_172669    |
| D10BWG1364E   | DNA SEGMENT, CHR 10, BRIGHAM & WOMEN'S GENETICS 1364 EXPRESSED                         | NM_145421    |
| D12ERTD551E   | DNA SEGMENT, CHR 12, ERATO DOI 551, EXPRESSED                                          | NM_028731    |
| D19ERTD386E   | DNA SEGMENT, CHR 19, ERATO DOI 386, EXPRESSED                                          | NM_177464    |
| D19ERTD721E   | DNA SEGMENT, CHR 19, ERATO DOI 721, EXPRESSED                                          | NM_146093    |
| D230010M03RIK | RIKEN CDNA D230010M03 GENE                                                             | NM_178724    |
| D6WSU116E     | DNA SEGMENT, CHR 6, WAYNE STATE UNIVERSITY 116, EXPRESSED                              | NM_026585    |
| D930020E02RIK | RIKEN CDNA D930020E02 GENE                                                             | NM_173420    |
| DAPK2         | DEATH-ASSOCIATED KINASE 2                                                              | NM_010019    |
| DAZAP2        | DAZ ASSOCIATED PROTEIN 2                                                               | NM_011873    |
| DDAH1         | DIMETHYLARGININE DIMETHYLAMINOHYDROLASE 1                                              | NM_026993    |
| DDOST         | DOLICHYL-DI-PHOSPHOOLIGOSACCHARIDE-PROTEIN GLYCOTRANSFERASE                            | NM_007838    |
| DDX20         | DEAD (ASP-GLU-ALA-ASP) BOX POLYPEPTIDE 20                                              | NM_017397    |
| DDX27         | DEAD (ASP-GLU-ALA-ASP) BOX POLYPEPTIDE 27                                              | NM_153065    |
| DDX49         | DEAD (ASP-GLU-ALA-ASP) BOX POLYPEPTIDE 49                                              | NM_001024922 |
| DECR2         | 2-4-DIENOYL-COENZYME A REDUCTASE 2, PEROXISOMAL                                        | NM_011933    |
| DFFA          | DNA FRAGMENTATION FACTOR, ALPHA SUBUNIT                                                | NM_001025296 |
| DHX37         | DEAH (ASP-GLU-ALA-HIS) BOX POLYPEPTIDE 37                                              | NM_203319    |
| DLG2          | DISCS, LARGE HOMOLOG 2 (DROSOPHILA)                                                    | NM_011807    |
| DMRTC2        | DOUBLESEX AND MAB-3 RELATED TRANSCRIPTION FACTOR LIKE FAMILY C2                        | NM_027732    |
| DNAJC9        | DNAJ (HSP40) HOMOLOG, SUBFAMILY C, MEMBER 9                                            | NM_134081    |
| DNM1L         | DYNAMIN 1-LIKE                                                                         | NM_152816    |
| DRAP1         | DR1 ASSOCIATED PROTEIN 1 (NEGATIVE COFACTOR 2 ALPHA)                                   | NM_024176    |
| DSE           | SQUAMOUS CELL CARCINOMA ANTIGEN RECOGNIZED BY T CELLS 2                                | NM_172508    |
| DVL3          | DISHEVELLED 3, DSH HOMOLOG (DROSOPHILA)                                                | NM_007889    |
| DYNC1H1       | DYNEIN CYTOPLASMIC 1 HEAVY CHAIN 1                                                     | NM_030238    |
| DYNC1I2       | DYNEIN CYTOPLASMIC 1 INTERMEDIATE CHAIN 2                                              | NM_010064    |
| EDEM1         | ER DEGRADATION ENHANCER, MANNOSIDASE ALPHA-LIKE 1                                      | NM_138677    |

|          |                                                                                                 |              |
|----------|-------------------------------------------------------------------------------------------------|--------------|
| EDG6     | ENDOTHELIAL DIFFERENTIATION, G-PROTEIN-<br>COUPLED RECEPTOR 6                                   | NM_010102    |
| EFNA1    | EPHRIN A1                                                                                       | NM_010107    |
| EG432743 | HYPOTHETICAL GENE SUPPORTED BY<br>AK077314                                                      | NM_001013788 |
| EG628412 | CDNA SEQUENCE BC034507                                                                          | NM_153116    |
| EHBP1    | EH DOMAIN BINDING PROTEIN 1                                                                     | NM_153078    |
| EIF2B4   | EUKARYOTIC TRANSLATION INITIATION<br>FACTOR 2B, SUBUNIT 4 DELTA                                 | NM_010122    |
| EIF2S1   | EUKARYOTIC TRANSLATION INITIATION<br>FACTOR 2, SUBUNIT 1 ALPHA                                  | NM_026114    |
| EIF3E    | EUKARYOTIC TRANSLATION INITIATION<br>FACTOR 3, SUBUNIT 6                                        | NM_008388    |
| EIF3E    | EUKARYOTIC TRANSLATION INITIATION<br>FACTOR 3, SUBUNIT 6                                        | NM_008388    |
| ENY2     | ENHANCER OF YELLOW 2 HOMOLOG<br>(DROSOPHILA)                                                    | NM_175009    |
| EPAS1    | ENDOTHELIAL PAS DOMAIN PROTEIN 1                                                                | NM_010137    |
| EPRS     | GLUTAMYL-PROLYL-TRNA SYNTHETASE                                                                 | NM_029735    |
| EPS15    | EPIDERMAL GROWTH FACTOR RECEPTOR<br>PATHWAY SUBSTRATE 15                                        | NM_007943    |
| ERCC2    | EXCISION REPAIR CROSS-COMPLEMENTING<br>RODENT REPAIR DEFICIENCY,<br>COMPLEMENTATION GROUP 2     | NM_007949    |
| ERF      | ETS2 REPRESSOR FACTOR                                                                           | NM_010155    |
| ERH      | ENHANCER OF RUDIMENTARY HOMOLOG<br>(DROSOPHILA)                                                 | NM_007951    |
| ERN1     | ENDOPLASMIC RETICULUM (ER) TO NUCLEUS<br>SIGNALLING 1                                           | NM_023913    |
| ERRF1    | ERBB RECEPTOR FEEDBACK INHIBITOR 1                                                              | NM_133753    |
| ESR1     | ESTROGEN RECEPTOR 1 (ALPHA)                                                                     | NM_007956    |
| EXTL1    | EXOSTOSES (MULTIPLE)-LIKE 1                                                                     | NM_019578    |
| FASN     | FATTY ACID SYNTHASE                                                                             | NM_007988    |
| FAU      | FINKEL-BISKIS-REILLY MURINE SARCOMA<br>VIRUS (FBR-MUSV) UBIQUITOUSLY<br>EXPRESSED (FOX DERIVED) | NM_007990    |
| FBXL19   | F-BOX AND LEUCINE-RICH REPEAT PROTEIN 19                                                        | NM_172748    |
| FBXL22   | F-BOX AND LEUCINE-RICH REPEAT PROTEIN 22                                                        | NM_175206    |
| FBXO4    | F-BOX ONLY PROTEIN 4                                                                            | NM_134099    |
| FGD2     | FYVE, RHOGEF AND PH DOMAIN CONTAINING 2                                                         | NM_013710    |
| FGD4     | FYVE, RHOGEF AND PH DOMAIN CONTAINING 4                                                         | NM_139232    |
| FGF22    | FIBROBLAST GROWTH FACTOR 22                                                                     | NM_023304    |
| FGFR3    | FIBROBLAST GROWTH FACTOR RECEPTOR 3                                                             | NM_008010    |
| FGFR3    | FIBROBLAST GROWTH FACTOR RECEPTOR 3                                                             | NM_008010    |
| FHIT     | FRAGILE HISTIDINE TRIAD GENE                                                                    | NM_010210    |
| FLAD1    | LENS EPITHELIAL PROTEIN                                                                         | NM_020517    |
| FLRT2    | MITOGEN-ACTIVATED PROTEIN KINASE KINASE<br>KINASE KINASE 5                                      | NM_201518    |
| FMN2     | FORMIN 2                                                                                        | NM_019445    |
| FMO5     | FLAVIN CONTAINING MONOOXYGENASE 5                                                               | NM_010232    |
| FN1      | FIBRONECTIN 1                                                                                   | NM_010233    |
| FN1      | FIBRONECTIN 1                                                                                   | NM_010233    |
| FNTB     | EXPRESSED SEQUENCE AA409500                                                                     | NM_145927    |
| FOXA3    | FORKHEAD BOX A3                                                                                 | NM_008260    |
| FOXN4    | FORKHEAD BOX N4                                                                                 | NM_148935    |
| FOXO3A   | FORKHEAD BOX O3A                                                                                | NM_019740    |
| FRAP1    | FK506 BINDING PROTEIN 12-RAPAMYCIN<br>ASSOCIATED PROTEIN 1                                      | NM_001039554 |
| FRAP1    | FK506 BINDING PROTEIN 12-RAPAMYCIN                                                              | NM_020009    |

|             |                                                                                                                           |              |
|-------------|---------------------------------------------------------------------------------------------------------------------------|--------------|
|             | ASSOCIATED PROTEIN 1                                                                                                      |              |
| FTSJ2       | FTSJ HOMOLOG 2 (E. COLI)                                                                                                  | NM_026510    |
| FUT8        | FUCOSYLTRANSFERASE 8                                                                                                      | NM_016893    |
| FXVD4       | RIKEN CDNA 0610008102 GENE                                                                                                | NM_033648    |
| GABARAP     | GAMMA-AMINOBUTYRIC ACID RECEPTOR ASSOCIATED PROTEIN                                                                       | NM_019749    |
| GABRD       | GAMMA-AMINOBUTYRIC ACID (GABA-A) RECEPTOR, SUBUNIT DELTA                                                                  | NM_008072    |
| GAD2        | GLUTAMIC ACID DECARBOXYLASE 2                                                                                             | NM_008078    |
| GADD45A     | GROWTH ARREST AND DNA-DAMAGE-INDUCIBLE 45 ALPHA                                                                           | NM_007836    |
| GAL3ST3     | SIMILAR TO GALACTOSE-3-O-SULFOTRANSFERASE 3 (GALBETA1-3GALNAC 3-SULFOTRANSFERASE) (BETA-GALACTOSE-3-O-SULFOTRANSFERASE 3) | NM_001024717 |
| GALNACT2    | CHONDROITIN SULFATE GALNACT-2                                                                                             | NM_030165    |
| GALNTL2     | UDP-N-ACETYL-ALPHA-D-GALACTOSAMINE:POLYPEPTIDE N-ACETYL GALACTOSAMINYLTRANSFERASE-LIKE 2                                  | NM_030166    |
| GAPDHS      | GLYCERALDEHYDE-3-PHOSPHATE DEHYDROGENASE, SPERMATOGENIC                                                                   | NM_008085    |
| GENE_SYMBOL | Gene Name                                                                                                                 | InputID      |
| GFOD1       | GLUCOSE-FRUCTOSE OXIDOREDUCTASE DOMAIN CONTAINING 1                                                                       | NM_001033399 |
| GGTL3       | GAMMA-GLUTAMYLTRANSFERASE-LIKE 3                                                                                          | NM_144786    |
| GJA10       | GAP JUNCTION MEMBRANE CHANNEL PROTEIN ALPHA 10                                                                            | NM_010289    |
| GM1568      | GENE MODEL 1568, (NCBI)                                                                                                   | NM_001008423 |
| GM672       | GENE MODEL 672, (NCBI)                                                                                                    | NM_201354    |
| GNE         | GLUCOSAMINE                                                                                                               | NM_015828    |
| GNG12       | GUANINE NUCLEOTIDE BINDING PROTEIN (G PROTEIN), GAMMA 12                                                                  | NM_025278    |
| GNG2        | GUANINE NUCLEOTIDE BINDING PROTEIN (G PROTEIN), GAMMA 2 SUBUNIT                                                           | NM_001038637 |
| GNG4        | GUANINE NUCLEOTIDE BINDING PROTEIN (G PROTEIN), GAMMA 4 SUBUNIT                                                           | NM_010317    |
| GNPNAT1     | GLUCOSAMINE-PHOSPHATE N-ACETYLTRANSFERASE 1                                                                               | NM_019425    |
| GPAM        | GLYCEROL-3-PHOSPHATE ACYLTRANSFERASE, MITOCHONDRIAL                                                                       | NM_008149    |
| GPER        | G PROTEIN-COUPLED RECEPTOR 30                                                                                             | NM_029771    |
| GPHN        | GEPHYRIN                                                                                                                  | NM_172952    |
| GPR85       | G PROTEIN-COUPLED RECEPTOR 85                                                                                             | NM_145066    |
| GREM2       | GREMLIN 2 HOMOLOG, CYSTEINE KNOT SUPERFAMILY (XENOPUS LAEVIS)                                                             | NM_011825    |
| GRIK4       | GLUTAMATE RECEPTOR, IONOTROPIC, KAINATE 4                                                                                 | NM_175481    |
| GRIN1       | GLUTAMATE RECEPTOR, IONOTROPIC, NMDA1 (ZETA 1)                                                                            | NM_008169    |
| GRINA       | GLUTAMATE RECEPTOR, IONOTROPIC, N-METHYL D-ASPARATE-ASSOCIATED PROTEIN 1 (GLUTAMATE BINDING)                              | NM_023168    |
| GRINL1A     | GLUTAMATE RECEPTOR, IONOTROPIC, N-METHYL D-ASPARTATE-LIKE 1A                                                              | NM_178602    |
| GRK4        | G PROTEIN-COUPLED RECEPTOR KINASE 2, GROUCHO GENE RELATED (DROSOPHILA)                                                    | NM_019497    |
| GRM4        | GLUTAMATE RECEPTOR, METABOTROPIC 4                                                                                        | NM_001013385 |
| GRM7        | GLUTAMATE RECEPTOR, METABOTROPIC 7                                                                                        | NM_177328    |
| GSDMA1      | GASDERMIN 1                                                                                                               | NM_021347    |

|         |                                                                     |              |
|---------|---------------------------------------------------------------------|--------------|
| GSK3A   | GLYCOGEN SYNTHASE KINASE 3 ALPHA                                    | NM_001031667 |
| GSS     | GLUTATHIONE SYNTHETASE                                              | NM_008180    |
| GTPBP2  | GTP BINDING PROTEIN 2                                               | NM_019581    |
| GUCY1A3 | GUANYLATE CYCLASE 1, SOLUBLE, ALPHA 3                               | NM_021896    |
| H3F3B   | H3 HISTONE, FAMILY 3A                                               | NM_008211    |
| HCFC1R1 | HOST CELL FACTOR C1 REGULATOR 1 (XPO1-DEPENDENT)                    | NM_181821    |
| HDGF    | HEPATOMA-DERIVED GROWTH FACTOR                                      | NM_008231    |
| HEATR5A | HYPOTHETICAL PROTEIN LOC268546                                      | NM_177171    |
| HERPUD2 | RIKEN CDNA 5031400M07 GENE                                          | NM_020586    |
| HEY1    | HAIRY/ENHANCER-OF-SPLIT RELATED WITH YRPW MOTIF 1                   | NM_010423    |
| HEYL    | HAIRY-RELATED TRANSCRIPTION FACTOR 3                                | NM_013905    |
| HINT3   | HISTIDINE TRIAD NUCLEOTIDE BINDING PROTEIN 3                        | NM_025798    |
| HMX2    | H6 HOMEO BOX 2                                                      | NM_145998    |
| HOMER3  | HOMER HOMOLOG 3 (DROSOPHILA)                                        | NM_001024922 |
| HOXC13  | HOMEO BOX C13                                                       | NM_010464    |
| HPSE    | HEPARANASE                                                          | NM_152803    |
| HSD17B2 | HYDROXYSTEROID (17-BETA) DEHYDROGENASE 2                            | NM_008290    |
| HSP110  | HEAT SHOCK PROTEIN 110                                              | NM_013559    |
| HSPB3   | HEAT SHOCK PROTEIN 3                                                | NM_019960    |
| HSPC171 | HSPC171 PROTEIN                                                     | NM_025486    |
| HTF9C   | HPAII TINY FRAGMENTS LOCUS 9C                                       | NM_008307    |
| HTR5A   | 5-HYDROXYTRYPTAMINE (SEROTONIN) RECEPTOR 5A                         | NM_008314    |
| HUS1B   | HUS1 HOMOLOG B (S. POMBE)                                           | NM_153072    |
| ICK     | INTESTINAL CELL KINASE                                              | NM_019987    |
| IFIT2   | INTERFERON-INDUCED PROTEIN WITH TETRATRICOPEPTIDE REPEATS 2         | NM_008332    |
| IFT20   | INTRAFLAGELLAR TRANSPORT 20 HOMOLOG (CHLAMYDOMONAS)                 | NM_018854    |
| IFT74   | INTRAFLAGELLAR TRANSPORT 74 HOMOLOG (CHLAMYDOMONAS)                 | NM_026319    |
| IGFBP1  | INSULIN-LIKE GROWTH FACTOR BINDING PROTEIN 1                        | NM_008341    |
| IMPACT  | IMPRINTED AND ANCIENT                                               | NM_008378    |
| INSIG1  | INSULIN INDUCED GENE 1                                              | NM_153526    |
| IRAK3   | INTERLEUKIN-1 RECEPTOR-ASSOCIATED KINASE 3                          | NM_028679    |
| IRF2    | INTERFERON REGULATORY FACTOR 2                                      | NM_008391    |
| ITPR1   | INOSITOL 1,4,5-TRIPHOSPHATE RECEPTOR 1                              | NM_010585    |
| JOSD2   | JOSEPHIN DOMAIN CONTAINING 2                                        | NM_025368    |
| JUN     | JUN ONCOGENE                                                        | NM_010591    |
| KBTBD2  | KELCH REPEAT AND BTB (POZ) DOMAIN CONTAINING 2                      | NM_145958    |
| KCNA5   | POTASSIUM VOLTAGE-GATED CHANNEL, SHAKER-RELATED SUBFAMILY, MEMBER 5 | NM_145983    |
| KCNK5   | POTASSIUM CHANNEL, SUBFAMILY K, MEMBER 5                            | NM_021542    |
| KCNK6   | POTASSIUM INWARDLY-RECTIFYING CHANNEL, SUBFAMILY K, MEMBER 6        | NM_001033525 |
| KCTD14  | POTASSIUM CHANNEL TETRAMERISATION DOMAIN CONTAINING 14              | NM_001012434 |
| KIF13A  | KINESIN FAMILY MEMBER 13A                                           | NM_010617    |
| KIF17   | KINESIN FAMILY MEMBER 17                                            | NM_010623    |
| KIF21B  | KINESIN FAMILY MEMBER 21B                                           | NM_001039472 |
| KIF3B   | KINESIN FAMILY MEMBER 3B                                            | NM_008444    |



|           |                                                                            |              |
|-----------|----------------------------------------------------------------------------|--------------|
| KLC2      | KINESIN LIGHT CHAIN 2                                                      | NM_008451    |
| KLF3      | KRUPPEL-LIKE FACTOR 3 (BASIC)                                              | NM_008453    |
| KLHDC6    | RIKEN CDNA 4933428M03 GENE                                                 | NM_029013    |
| KLRG1     | KILLER CELL LECTIN-LIKE RECEPTOR<br>SUBFAMILY G, MEMBER 1                  | NM_016970    |
| KPNA2     | KARYOPHERIN (IMPORTIN) ALPHA 2                                             | NM_010655    |
| KRCC1     | EST AA792894                                                               | NM_145568    |
| KTELC1    | RIKEN CDNA 9630046K23 GENE                                                 | NM_172380    |
| LACE1     | LACTATION ELEVATED 1                                                       | NM_145743    |
| LACTB2    | LACTAMASE, BETA 2                                                          | NM_145381    |
| LAMP1     | LYSOSOMAL MEMBRANE GLYCOPROTEIN 1                                          | NM_010684    |
| LARS2     | LEUCYL-TRNA SYNTHETASE, MITOCHONDRIAL                                      | NM_153168    |
| LBX1      | LADYBIRD HOMEBOX HOMOLOG 1<br>(DROSOPHILA)                                 | NM_010691    |
| LCTL      | LACTASE-LIKE                                                               | NM_145835    |
| LEMD2     | LEM DOMAIN CONTAINING 2                                                    | NM_146075    |
| LENG8     | LEUKOCYTE RECEPTOR CLUSTER (LRC)<br>MEMBER 8                               | NM_172736    |
| LEO1      | LEO1, PAF1/RNA POLYMERASE II COMPLEX<br>COMPONENT, HOMOLOG (S. CEREVISIAE) | NM_001039522 |
| LEP       | LEPTIN                                                                     | NM_008493    |
| LETM1     | LEUCINE ZIPPER-EF-HAND CONTAINING<br>TRANSMEMBRANE PROTEIN 1               | NM_019694    |
| LHX9      | LIM HOMEBOX PROTEIN 9                                                      | NM_001025565 |
| LIPA      | LYSOSOMAL ACID LIPASE 1                                                    | NM_021460    |
| LIPI      | RIKEN CDNA D930038D03 GENE                                                 | NM_177142    |
| LMBRD2    | LMBR1 DOMAIN CONTAINING 2                                                  | NM_177178    |
| LMLN      | LEISHMANOLYSIN-LIKE (METALLOPEPTIDASE<br>M8 FAMILY)                        | NM_172823    |
| LMNB2     | LAMIN B2                                                                   | NM_010722    |
| LNX2      | LIGAND OF NUMB-PROTEIN X 2                                                 | NM_080795    |
| LOC621832 | NUCLEAR TRANSPORT FACTOR 2                                                 | NM_026532    |
| LOC627166 | PROTEIN TYROSINE PHOSPHATASE 4A1                                           | NM_011200    |
| LOC631069 | RIBOSOMAL PROTEIN L27                                                      | NM_011289    |
| LPIN1     | LIPIN 1                                                                    | NM_172950    |
| LPP       | LIM DOMAIN CONTAINING PREFERRED<br>TRANSLOCATION PARTNER IN LIPOMA         | NM_178665    |
| LRP1B     | LOW DENSITY LIPOPROTEIN-RELATED<br>PROTEIN 1B (DELETED IN TUMORS)          | NM_053011    |
| LRPPRC    | LEUCINE-RICH PPR-MOTIF CONTAINING                                          | NM_028233    |
| LRRC29    | LEUCINE RICH REPEAT CONTAINING 29                                          | NM_177449    |
| LRRC4B    | LEUCINE RICH REPEAT CONTAINING 4B                                          | NM_198250    |
| LRRC9     | RIKEN CDNA 4921529O18 GENE                                                 | NM_030070    |
| LRRK1     | LEUCINE-RICH REPEAT KINASE 1                                               | NM_146191    |
| LRRN1     | LEUCINE RICH REPEAT PROTEIN 1, NEURONAL                                    | NM_008516    |
| LSM10     | U7 SNRNP-SPECIFIC SM-LIKE PROTEIN LSM10                                    | NM_138721    |
| LSM5      | LSM5 HOMOLOG, U6 SMALL NUCLEAR RNA<br>ASSOCIATED (S. CEREVISIAE)           | NM_025520    |
| LSMD1     | LSM DOMAIN CONTAINING 1                                                    | NM_030083    |
| LY6F      | LYMPHOCYTE ANTIGEN 6 COMPLEX, LOCUS F                                      | NM_008530    |
| LYRM4     | CDNA SEQUENCE BC034664                                                     | NM_201358    |
| LZIC      | LEUCINE ZIPPER AND CTNNBIP1 DOMAIN<br>CONTAINING                           | NM_026963    |
| M6PR      | MANNOSE-6-PHOSPHATE RECEPTOR, CATION<br>DEPENDENT                          | NM_010749    |
| MAD1L1    | MITOTIC ARREST DEFICIENT 1-LIKE 1                                          | NM_010752    |
| MAD2L1BP  | MAD2L1 BINDING PROTEIN                                                     | NM_025649    |
| MALT1     | MUCOSA ASSOCIATED LYMPHOID TISSUE<br>LYMPHOMA TRANSLOCATION GENE 1         | NM_172833    |

|           |                                                                                 |              |
|-----------|---------------------------------------------------------------------------------|--------------|
| MAN1B1    | MANNOSIDASE, ALPHA, CLASS 1B, MEMBER 1                                          | NM_001029983 |
| MAP2K4    | MITOGEN ACTIVATED PROTEIN KINASE KINASE 4                                       | NM_009157    |
| MAP3K7IP2 | MITOGEN-ACTIVATED PROTEIN KINASE KINASE 7 INTERACTING PROTEIN 2                 | NM_138667    |
| MAPBPIP   | MITOGEN ACTIVATED PROTEIN BINDING PROTEIN INTERACTING PROTEIN                   | NM_031248    |
| MAPK6     | MITOGEN ACTIVATED PROTEIN KINASE 4                                              | NM_015806    |
| MAPKAPK5  | MAP KINASE-ACTIVATED PROTEIN KINASE 5                                           | NM_010765    |
| MAT2A     | METHIONINE ADENOSYLTRANSFERASE II, ALPHA                                        | NM_145569    |
| MAX       | MAX PROTEIN                                                                     | NM_008558    |
| MBNL2     | MUSCLEBLIND-LIKE 2                                                              | NM_207515    |
| MDH1      | MALATE DEHYDROGENASE 1, NAD (SOLUBLE)                                           | NM_008618    |
| MED20     | TRF (TATA BINDING PROTEIN-RELATED FACTOR)-PROXIMAL PROTEIN HOMOLOG (DROSOPHILA) | NM_020048    |
| MED22     | SURFEIT GENE 5                                                                  | NM_011513    |
| MFN2      | MITOFUSIN 2                                                                     | NM_133201    |
| MKLN1     | MUSKELIN 1, INTRACELLULAR MEDIATOR CONTAINING KELCH MOTIFS                      | NM_013791    |
| MKNK2     | MAP KINASE-INTERACTING SERINE/THREONINE KINASE 2                                | NM_021462    |
| MMACHC    | METHYLMALONIC ACIDURIA CBLC TYPE, WITH HOMOCYSTINURIA                           | NM_025962    |
| MOGAT1    | MONOACYLGLYCEROL O-ACYLTRANSFERASE 1                                            | NM_026713    |
| MON1A     | MON1 HOMOLOG A (YEAST)                                                          | NM_028369    |
| MREG      | WHN-DEPENDENT TRANSCRIPT 2                                                      | NM_001005423 |
| MRPL14    | MITOCHONDRIAL RIBOSOMAL PROTEIN L14                                             | NM_026732    |
| MRPL49    | MITOCHONDRIAL RIBOSOMAL PROTEIN L49                                             | NM_026246    |
| MRPS16    | MITOCHONDRIAL RIBOSOMAL PROTEIN S16                                             | NM_025440    |
| MRPS28    | MITOCHONDRIAL RIBOSOMAL PROTEIN S28                                             | NM_025434    |
| MRPS35    | MITOCHONDRIAL RIBOSOMAL PROTEIN S35                                             | NM_145573    |
| MSRA      | RIKEN CDNA 2310045J23 GENE                                                      | NM_026322    |
| MT1       | METALLOTHIONEIN 1                                                               | NM_013602    |
| MT1       | METALLOTHIONEIN 1                                                               | NM_013602    |
| MTFR1     | MITOCHONDRIAL FISSION REGULATOR 1                                               | NM_026182    |
| MTIF3     | RIKEN CDNA 2810012L14 GENE                                                      | NM_029581    |
| MTTP      | MICROSOMAL TRIGLYCERIDE TRANSFER PROTEIN                                        | NM_008642    |
| MXI1      | MAX INTERACTING PROTEIN 1                                                       | NM_001008542 |
| MXI1      | MAX INTERACTING PROTEIN 1                                                       | NM_010847    |
| MYD116    | MYELOID DIFFERENTIATION PRIMARY RESPONSE GENE 116                               | NM_008654    |
| MYO1G     | MYOSIN IG                                                                       | NM_178440    |
| MYSM1     | RIKEN CDNA C530050H10 GENE                                                      | NM_177239    |
| NAT5      | N-ACETYLTRANSFERASE 5 (ARD1 HOMOLOG, S. CEREVISIAE)                             | NM_026425    |
| NCBP2     | NUCLEAR CAP BINDING PROTEIN SUBUNIT 2                                           | NM_026554    |
| NCLN      | RIKEN CDNA 3100002P13 GENE                                                      | NM_134009    |
| NCOA1     | NUCLEAR RECEPTOR COACTIVATOR 1                                                  | NM_010881    |
| NCOR2     | NUCLEAR RECEPTOR CO-REPRESSOR 2                                                 | NM_011424    |
| NDST1     | N-DEACETYLASE/N-SULFOTRANSFERASE (HEPARAN GLUCOSAMINYL) 1                       | NM_008306    |
| NDUFA5    | NADH DEHYDROGENASE (UBIQUINONE) 1 ALPHA SUBCOMPLEX, 5                           | NM_026614    |
| NDUFA7    | NADH DEHYDROGENASE (UBIQUINONE) 1 ALPHA SUBCOMPLEX, 7 (B14.5A)                  | NM_023202    |

|                        |                                                                              |              |
|------------------------|------------------------------------------------------------------------------|--------------|
| NDUFB2                 | NADH DEHYDROGENASE (UBIQUINONE) 1 BETA SUBCOMPLEX, 2                         | NM_026612    |
| NEDD4L                 | NEURAL PRECURSOR CELL EXPRESSED, DEVELOPMENTALLY DOWN-REGULATED GENE 4-LIKE  | NM_031881    |
| NEK7                   | NIMA (NEVER IN MITOSIS GENE A)-RELATED EXPRESSED KINASE 7                    | NM_021605    |
| NENF                   | NEURON DERIVED NEUROTROPHIC FACTOR                                           | NM_025424    |
| NETO1                  | NEUROFILIN (NRP) AND TOLLOID (TLL)-LIKE 1                                    | NM_144946    |
| NFATC1                 | NUCLEAR FACTOR OF ACTIVATED T-CELLS, CYTOPLASMIC, CALCINEURIN-DEPENDENT 1    | NM_198429    |
| NFKB1B                 | NUCLEAR FACTOR OF KAPPA LIGHT CHAIN GENE ENHANCER IN B-CELLS INHIBITOR, BETA | NM_010908    |
| NGFR                   | NERVE GROWTH FACTOR RECEPTOR (TNFR SUPERFAMILY, MEMBER 16)                   | NM_033217    |
| NKX2-2                 | NK2 TRANSCRIPTION FACTOR RELATED, LOCUS 2 (DROSOPHILA)                       | NM_010919    |
| NOL14                  | RIKEN CDNA 2610033H07 GENE                                                   | NM_029278    |
| NOTCH2                 | NOTCH GENE HOMOLOG 2 (DROSOPHILA)                                            | NM_010928    |
| NOTUM                  | RIKEN CDNA 5730593N15 GENE                                                   | NM_175263    |
| NRAP                   | NEBULIN-RELATED ANCHORING PROTEIN                                            | NM_198059    |
| NRN1L                  | RIKEN CDNA G630049C14 GENE                                                   | NM_175024    |
| NRTN                   | NEURTURIN                                                                    | NM_008738    |
| NSUN2                  | NOL1/NOP2/SUN DOMAIN FAMILY 2                                                | NM_145354    |
| NTF3                   | NEUROTROPHIN 3                                                               | NM_008742    |
| NTRK2                  | NEUROTROPHIC TYROSINE KINASE, RECEPTOR, TYPE 2                               | NM_001025074 |
| NTRK2                  | NEUROTROPHIC TYROSINE KINASE, RECEPTOR, TYPE 2                               | NM_001025074 |
| NTSR2                  | NEUROTENSIN RECEPTOR 2                                                       | NM_008747    |
| NUDCD1                 | NUDC DOMAIN CONTAINING 1                                                     | NM_026149    |
| NUDT13                 | NUDIX (NUCLEOSIDE DIPHOSPHATE LINKED MOIETY X)-TYPE MOTIF 13                 | NM_026341    |
| NUP153                 | NUCLEOPORIN 153                                                              | NM_175749    |
| NUP54                  | NUCLEOPORIN 54                                                               | NM_183392    |
| NUP93                  | NUCLEOPORIN 93                                                               | NM_172410    |
| NVL                    | NUCLEAR VCP-LIKE                                                             | NM_026171    |
| ORF63                  | OPEN READING FRAME 63                                                        | NM_144854    |
| OSBPL11                | OXISTEROL BINDING PROTEIN-LIKE 11                                            | NM_176840    |
| OSBPL1A                | OXISTEROL BINDING PROTEIN-LIKE 1A                                            | NM_207530    |
| OTTMUSG0000001<br>6703 | HYPOTHETICAL PROTEIN A830093M07                                              | NM_177843    |
| PABPC4                 | POLY A BINDING PROTEIN, CYTOPLASMIC 4                                        | NM_130881    |
| PACSIN3                | PROTEIN KINASE C AND CASEIN KINASE SUBSTRATE IN NEURONS 3                    | NM_028733    |
| PAFAH2                 | PLATELET-ACTIVATING FACTOR ACETYLMYRINASE 2                                  | NM_133880    |
| PAG1                   | PHOSPHOPROTEIN ASSOCIATED WITH GLYCOPHINGOLIPID MICRODOMAINS 1               | NM_053182    |
| PANK4                  | PANTOTHENATE KINASE 4                                                        | NM_172990    |
| PAQR9                  | PROGESTIN AND ADIPOQ RECEPTOR FAMILY MEMBER IX                               | NM_198414    |
| PAX1                   | PAIRED BOX GENE 1                                                            | NM_008780    |
| PCOLCE2                | PROCOLLAGEN C-ENDOPEPTIDASE ENHANCER 2                                       | NM_029620    |
| PDCD4                  | PROGRAMMED CELL DEATH 4                                                      | NM_011050    |
| PDK1                   | PYRUVATE DEHYDROGENASE KINASE, ISOENZYME 1                                   | NM_172665    |
| PECAM1                 | PLATELET/ENDOTHELIAL CELL ADHESION MOLECULE 1                                | NM_008816    |

|          |                                                                               |              |
|----------|-------------------------------------------------------------------------------|--------------|
| PECAM1   | PLATELET/ENDOTHELIAL CELL ADHESION MOLECULE 1                                 | NM_008816    |
| PES1     | PESCADILLO HOMOLOG 1, CONTAINING BRCT DOMAIN (ZEBRAFISH)                      | NM_022889    |
| PEX14    | PEROXISOMAL BIOGENESIS FACTOR 14                                              | NM_019781    |
| PEX2     | PEROXIN 2                                                                     | NM_021483    |
| PGC      | RIKEN CDNA 2210410L06 GENE                                                    | NM_025973    |
| PGLYRP2  | PEPTIDOGLYCAN RECOGNITION PROTEIN 2                                           | NM_021319    |
| PHB      | PROHIBITIN                                                                    | NM_008831    |
| PHF12    | PHD FINGER PROTEIN 12                                                         | NM_174852    |
| PHF23    | PHD FINGER PROTEIN 23                                                         | NM_030064    |
| PHKG2    | PHOSPHORYLASE KINASE, GAMMA 2 (TESTIS)                                        | NM_026888    |
| PIGZ     | PHOSPHATIDYLINOSITOL GLYCAN, CLASS Z                                          | NM_172822    |
| PIM1     | PROVIRAL INTEGRATION SITE 1                                                   | NM_008842    |
| PIP5K1A  | PHOSPHATIDYLINOSITOL-4-PHOSPHATE 5-KINASE, TYPE 1 BETA                        | NM_008847    |
| PLEC1    | PLECTIN 1                                                                     | NM_201387    |
| PLEKHB1  | PLECKSTRIN HOMOLOGY DOMAIN CONTAINING, FAMILY B (EVECTINS) MEMBER 1           | NM_013746    |
| PLEKHC1  | PLECKSTRIN HOMOLOGY DOMAIN CONTAINING, FAMILY C (WITH FERM DOMAIN) MEMBER 1   | NM_146054    |
| PLEKHG2  | PLECKSTRIN HOMOLOGY DOMAIN CONTAINING, FAMILY G (WITH RHOGEF DOMAIN) MEMBER 2 | NM_138752    |
| PLOD1    | PROCOLLAGEN-LYSINE, 2-OXOGLUTARATE 5-DIOXYGENASE 1                            | NM_011122    |
| PLS3     | PLASTIN 3 (T-ISOFORM)                                                         | NM_145629    |
| PLXND1   | PLEXIN D1                                                                     | NM_026376    |
| PNPT1    | POLYRIBONUCLEOTIDE NUCLEOTIDYLTRANSFERASE 1                                   | NM_027869    |
| PNRC1    | PROLINE-RICH NUCLEAR RECEPTOR COACTIVATOR 1                                   | NM_001033225 |
| PODXL    | PODOCALYXIN-LIKE                                                              | NM_013723    |
| POFUT1   | PROTEIN O-FUCOSYLTRANSFERASE 1                                                | NM_001039055 |
| POLE3    | POLYMERASE (DNA DIRECTED), EPSILON 3 (P17 SUBUNIT)                            | NM_021498    |
| POLRMT   | POLYMERASE (RNA) MITOCHONDRIAL (DNA DIRECTED)                                 | NM_172551    |
| POU6F1   | POU DOMAIN, CLASS 6, TRANSCRIPTION FACTOR 1                                   | NM_010127    |
| PPA1     | PYROPHOSPHATASE (INORGANIC) 1                                                 | NM_026438    |
| PPID     | PEPTIDYLPROLYL ISOMERASE D (CYCLOPHILIN D)                                    | NM_026352    |
| PPM1B    | PROTEIN PHOSPHATASE 1B, MAGNESIUM DEPENDENT, BETA ISOFORM                     | NM_011151    |
| PPP1R13L | PROTEIN PHOSPHATASE 1, REGULATORY (INHIBITOR) SUBUNIT 13 LIKE                 | NM_001010836 |
| PPP1R3A  | PROTEIN PHOSPHATASE 1, REGULATORY (INHIBITOR) SUBUNIT 3A                      | NM_080464    |
| PPP2R5B  | PROTEIN PHOSPHATASE 2, REGULATORY SUBUNIT B (B56), BETA ISOFORM               | NM_198168    |
| PPP6C    | PROTEIN PHOSPHATASE 6, CATALYTIC SUBUNIT                                      | NM_024209    |
| PRCC     | PAPILLARY RENAL CELL CARCINOMA (TRANSLOCATION-ASSOCIATED)                     | NM_033573    |
| PRDX2    | PEROXIREDOXIN 2                                                               | NM_011563    |
| PRH1     | PROLINE RICH PROTEIN HAEIII SUBFAMILY 1                                       | NM_011174    |
| PRKAB2   | PROTEIN KINASE, AMP-ACTIVATED, BETA 2 NON-CATALYTIC SUBUNIT                   | NM_182997    |

|          |                                                                 |              |
|----------|-----------------------------------------------------------------|--------------|
| PRKCZ    | PROTEIN KINASE C, ZETA                                          | NM_008860    |
| PRPF31   | PRP31 PRE-MRNA PROCESSING FACTOR 31<br>HOMOLOG (YEAST)          | NM_027328    |
| PRPF4B   | PRP4 PRE-MRNA PROCESSING FACTOR 4<br>HOMOLOG B (YEAST)          | NM_013830    |
| PRPMP5   | CDNA SEQUENCE BC061494                                          | NM_001024705 |
| PRR14    | CDNA SEQUENCE BC006909                                          | NM_145589    |
| PSKH1    | PROTEIN SERINE KINASE H1                                        | NM_173432    |
| PSMB2    | PROTEASOME (PROSOME, MACROPAIN)<br>SUBUNIT, BETA TYPE 2         | NM_011970    |
| PSMD3    | PROTEASOME (PROSOME, MACROPAIN) 26S<br>SUBUNIT, NON-ATPASE, 3   | NM_009439    |
| PTCH2    | PATCHED HOMOLOG 2                                               | NM_008958    |
| PTGES2   | PROSTAGLANDIN E SYNTHASE 2                                      | NM_133783    |
| PTPRD    | PROTEIN TYROSINE PHOSPHATASE,<br>RECEPTOR TYPE, D               | NM_011211    |
| PTPRG    | PROTEIN TYROSINE PHOSPHATASE,<br>RECEPTOR TYPE, G               | NM_008981    |
| PUF60    | RIKEN CDNA 2410104119 GENE                                      | NM_133691    |
| PURB     | PURINE RICH ELEMENT BINDING PROTEIN B                           | NM_011221    |
| PYGL     | LIVER GLYCOGEN PHOSPHORYLASE                                    | NM_133198    |
| QARS     | GLUTAMINYL-TRNA SYNTHETASE                                      | NM_133794    |
| QRICH1   | RIKEN CDNA 2610028H07 GENE                                      | NM_175143    |
| QSOX1    | RIKEN CDNA 1300003H02 GENE                                      | NM_001024945 |
| R3HDM1   | R3H DOMAIN 1 (BINDS SINGLE-STRANDED<br>NUCLEIC ACIDS)           | NM_181750    |
| RAB1B    | RAB1B, MEMBER RAS ONCOGENE FAMILY                               | NM_029576    |
| RAB39B   | RAB39B, MEMBER RAS ONCOGENE FAMILY                              | NM_175122    |
| RAD23B   | RAD23B HOMOLOG (S. CEREVISIAE)                                  | NM_009011    |
| RALYL    | RIKEN CDNA 0710005M24 GENE                                      | NM_178631    |
| RAMP1    | RECEPTOR (CALCITONIN) ACTIVITY MODIFYING<br>PROTEIN 1           | NM_016894    |
| RANBP1   | RAN BINDING PROTEIN 1                                           | NM_011239    |
| RANBP5   | RAN BINDING PROTEIN 5                                           | NM_023579    |
| RANGAP1  | RAN GTPASE ACTIVATING PROTEIN 1                                 | NM_011241    |
| RAP2A    | RAS RELATED PROTEIN 2A                                          | NM_029519    |
| RAPGEF4  | RAP GUANINE NUCLEOTIDE EXCHANGE<br>FACTOR (GEF) 4               | NM_019688    |
| RBL2     | RETINOBLASTOMA-LIKE 2                                           | NM_011250    |
| RBM28    | RNA BINDING MOTIF PROTEIN 28                                    | NM_133925    |
| RBM6     | RNA BINDING MOTIF PROTEIN 6                                     | NM_029169    |
| RBMS3    | RNA BINDING MOTIF, SINGLE STRANDED<br>INTERACTING PROTEIN       | NM_178660    |
| RBMY1A1  | RNA BINDING MOTIF PROTEIN, Y<br>CHROMOSOME, FAMILY 1, MEMBER A1 | NM_011253    |
| RC3H1    | RING CCCH (C3H) DOMAINS 1                                       | NM_001024952 |
| RDH10    | RETINOL DEHYDROGENASE 10 (ALL-TRANS)                            | NM_133832    |
| RG9MTD2  | RNA (GUANINE-9-) METHYLTRANSFERASE<br>DOMAIN CONTAINING 2       | NM_175389    |
| RG9MTD3  | RNA (GUANINE-9-) METHYLTRANSFERASE<br>DOMAIN CONTAINING 3       | NM_027266    |
| RGS16    | REGULATOR OF G-PROTEIN SIGNALING 16                             | NM_011267    |
| RGS8     | REGULATOR OF G-PROTEIN SIGNALING 8                              | NM_026380    |
| RIN2     | RAS AND RAB INTERACTOR 2                                        | NM_028724    |
| RMND1    | REQUIRED FOR MEITIC NUCLEAR DIVISION 1<br>HOMOLOG               | NM_025343    |
| RNASEH2A | RIBONUCLEASE H2, LARGE SUBUNIT                                  | NM_027187    |
| RND1     | RHO FAMILY GTPASE 1                                             | NM_172612    |
| RNF152   | RING FINGER PROTEIN 152                                         | NM_178779    |

|           |                                                                               |              |
|-----------|-------------------------------------------------------------------------------|--------------|
| RNF186    | RING FINGER PROTEIN 186                                                       | NM_025786    |
| RNF207    | RIKEN CDNA 330010C22 GENE                                                     | NM_001033489 |
| RNF38     | RING FINGER PROTEIN 38                                                        | NM_001038993 |
| RNF4      | RING FINGER PROTEIN 4                                                         | NM_011278    |
| RNGTT     | RNA GUANYLYLTRANSFERASE AND 5'-<br>PHOSPHATASE                                | NM_011884    |
| ROBO2     | RIKEN CDNA 2600013A04 GENE                                                    | NM_175549    |
| RORA      | RAR-RELATED ORPHAN RECEPTOR ALPHA                                             | NM_013646    |
| RORA      | RAR-RELATED ORPHAN RECEPTOR ALPHA                                             | NM_013646    |
| RORA      | RAR-RELATED ORPHAN RECEPTOR ALPHA                                             | NM_013646    |
| RPL18     | RIBOSOMAL PROTEIN L18                                                         | NM_009077    |
| RPL22     | RIBOSOMAL PROTEIN L22                                                         | NM_009079    |
| RPL36     | RIBOSOMAL PROTEIN L36                                                         | NM_145937    |
| RPL7A     | RIBOSOMAL PROTEIN L7A                                                         | NM_013721    |
| RPP40     | RIBONUCLEASE P 40 SUBUNIT (HUMAN)                                             | NM_145938    |
| RPS15     | RIBOSOMAL PROTEIN S15                                                         | NM_009091    |
| RPS19     | RIBOSOMAL PROTEIN S19                                                         | NM_023133    |
| RPS27A    | RIBOSOMAL PROTEIN S27A                                                        | NM_024277    |
| RPS28     | RIBOSOMAL PROTEIN S28                                                         | NM_016844    |
| RPS6KA1   | RIBOSOMAL PROTEIN S6 KINASE<br>POLYPEPTIDE 1                                  | NM_009097    |
| RPS6KB2   | RIBOSOMAL PROTEIN S6 KINASE,<br>POLYPEPTIDE 2                                 | NM_021485    |
| RRP1      | NOVEL NUCLEAR PROTEIN 1                                                       | NM_010925    |
| RSHL1     | RADIAL SPOKEHEAD-LIKE 1                                                       | NM_031255    |
| RTN1      | RETICULON 1                                                                   | NM_001007596 |
| RTN4      | RETICULON 4                                                                   | NM_194053    |
| RTP1      | RECEPTOR TRANSPORTER PROTEIN 1                                                | NM_001004151 |
| RUNDC1    | RUN DOMAIN CONTAINING 1                                                       | NM_172566    |
| SAMSN1    | SAM DOMAIN, SH3 DOMAIN AND NUCLEAR<br>LOCALIZATION SIGNALS, 1                 | NM_023380    |
| SAR1A     | SAR1 GENE HOMOLOG A (S. CEREVISIAE)                                           | NM_009120    |
| SCARB1    | SCAVENGER RECEPTOR CLASS B, MEMBER 1                                          | NM_016741    |
| SCARB2    | SCAVENGER RECEPTOR CLASS B, MEMBER 2                                          | NM_007644    |
| SCD1      | STEAROYL-COENZYME A DESATURASE 1                                              | NM_009127    |
| SCPEP1    | SERINE CARBOXYPEPTIDASE 1                                                     | NM_029023    |
| SCRIB     | SCRIBBLED HOMOLOG (DROSOPHILA)                                                | NM_134089    |
| SCYL1     | SCY1-LIKE 1 (S. CEREVISIAE)                                                   | NM_023912    |
| SDCCAG8   | RIKEN CDNA 5730470G24 GENE                                                    | NM_029756    |
| SEC23IP   | SEC23 INTERACTING PROTEIN                                                     | NM_001029982 |
| SEC61A1   | SEC61 ALPHA 1 SUBUNIT (S. CEREVISIAE)                                         | NM_016906    |
| SEL1L     | SEL1 (SUPPRESSOR OF LIN-12) 1 HOMOLOG (C.<br>ELEGANS)                         | NM_011344    |
| SERPINA3B | RIKEN CDNA A030003A19 GENE                                                    | NM_173024    |
| SERPINA5  | SERINE (OR CYSTEINE) PROTEINASE<br>INHIBITOR, CLADE A, MEMBER 5               | NM_172953    |
| SERPINC1  | SERINE (OR CYSTEINE) PEPTIDASE INHIBITOR,<br>CLADE C (ANTITHROMBIN), MEMBER 1 | NM_080844    |
| SERPINC1  | SERINE (OR CYSTEINE) PEPTIDASE INHIBITOR,<br>CLADE C (ANTITHROMBIN), MEMBER 1 | NM_080844    |
| SEZ6      | SEIZURE RELATED GENE 6                                                        | NM_021286    |
| SEZ6L2    | SEIZURE RELATED 6 HOMOLOG LIKE 2                                              | NM_144926    |
| SF3B2     | RIKEN CDNA 2810441F20 GENE                                                    | NM_030109    |
| SF4       | SPLICING FACTOR 4                                                             | NM_027481    |
| SFRS5     | SPLICING FACTOR, ARGININE/SERINE-RICH 5<br>(SRP40, HRS)                       | NM_009159    |
| SH2D3C    | SH2 DOMAIN CONTAINING 3C                                                      | NM_013781    |
| SH3BP4    | SH3-DOMAIN BINDING PROTEIN 4                                                  | NM_133816    |
| SHOC2     | SOC-2 (SUPPRESSOR OF CLEAR) HOMOLOG                                           | NM_019658    |

|          |                                                                                               |              |
|----------|-----------------------------------------------------------------------------------------------|--------------|
|          | (C. ELEGANS)                                                                                  |              |
| SIRT5    | SIRTIIN 5 (SILENT MATING TYPE INFORMATION REGULATION 2 HOMOLOG) 5 (S. CEREVISIAE)             | NM_178848    |
| SIRT6    | SIRTIIN 6 (SILENT MATING TYPE INFORMATION REGULATION 2, HOMOLOG) 6 (S. CEREVISIAE)            | NM_181586    |
| SKI      | SLOAN-KETTERING VIRAL ONCOGENE HOMOLOG                                                        | NM_011385    |
| SKP2     | S-PHASE KINASE-ASSOCIATED PROTEIN 2 (P45)                                                     | NM_145468    |
| SLC25A25 | SOLUTE CARRIER FAMILY 25 (MITOCHONDRIAL CARRIER, PHOSPHATE CARRIER), MEMBER 25                | NM_146118    |
| SLC25A30 | SOLUTE CARRIER FAMILY 25, MEMBER 30                                                           | NM_026232    |
| SLC25A37 | SOLUTE CARRIER FAMILY 25, MEMBER 37                                                           | NM_026331    |
| SLC35B3  | EXPRESSED SEQUENCE AI428480                                                                   | NM_134060    |
| SLC35B4  | SOLUTE CARRIER FAMILY 35, MEMBER B4                                                           | NM_021435    |
| SLC3A2   | SOLUTE CARRIER FAMILY 3 (ACTIVATORS OF DIBASIC AND NEUTRAL AMINO ACID TRANSPORT), MEMBER 2    | NM_008577    |
| SLC45A1  | SOLUTE CARRIER FAMILY 45, MEMBER 1                                                            | NM_173774    |
| SLC4A2   | SOLUTE CARRIER FAMILY 4 (ANION EXCHANGER), MEMBER 2                                           | NM_009207    |
| SLIT3    | SLIT HOMOLOG 3 (DROSOPHILA)                                                                   | NM_011412    |
| SMAD5    | MAD HOMOLOG 5 (DROSOPHILA)                                                                    | NM_008541    |
| SMAD6    | MAD HOMOLOG 6 (DROSOPHILA)                                                                    | NM_008542    |
| SMARCAL1 | SWI/SNF RELATED MATRIX ASSOCIATED, ACTIN DEPENDENT REGULATOR OF CHROMATIN, SUBFAMILY A-LIKE 1 | NM_018817    |
| SMEK2    | EXPRESSED SEQUENCE AW011752                                                                   | NM_134034    |
| SMU1     | SMU-1 SUPPRESSOR OF MEC-8 AND UNC-52 HOMOLOG (C. ELEGANS)                                     | NM_021535    |
| SMYD1    | SET AND MYND DOMAIN CONTAINING 1                                                              | NM_009762    |
| SNAG1    | SORTING NEXIN ASSOCIATED GOLGI PROTEIN 1                                                      | NM_130796    |
| SNAP23   | SYNAPTOSOMAL-ASSOCIATED PROTEIN 23                                                            | NM_009222    |
| SNRPA1   | U2 SMALL NUCLEAR RIBONUCLEOPROTEIN POLYPEPTIDE A'                                             | NM_021336    |
| SNRPC    | U1 SMALL NUCLEAR RIBONUCLEOPROTEIN 1C                                                         | NM_011432    |
| SNX1     | SORTING NEXIN 1                                                                               | NM_019727    |
| SNX17    | SORTING NEXIN 17                                                                              | NM_153680    |
| SNX3     | SORTING NEXIN 3                                                                               | NM_017472    |
| SOCS3    | SUPPRESSOR OF CYTOKINE SIGNALING 3                                                            | NM_007707    |
| SOLH     | SMALL OPTIC LOBES HOMOLOG (DROSOPHILA)                                                        | NM_015830    |
| SPECC1   | RIKEN CDNA 2810012G08 GENE                                                                    | NM_001029936 |
| SPHK2    | SPHINGOSINE KINASE 2                                                                          | NM_020011    |
| SRD5A1   | STEROID 5 ALPHA-REDUCTASE 1                                                                   | NM_175283    |
| SREBF1   | STEROL REGULATORY ELEMENT BINDING FACTOR 1                                                    | NM_011480    |
| ST6GAL1  | BETA GALACTOSIDE ALPHA 2,6 SIALYLTRANSFERASE 1                                                | NM_145933    |
| STARD13  | SEROLOGICALLY DEFINED COLON CANCER ANTIGEN 13                                                 | NM_146258    |
| STAU1    | STAUFEN (RNA BINDING PROTEIN) HOMOLOG 1 (DROSOPHILA)                                          | NM_011490    |
| STAU2    | STAUFEN (RNA BINDING PROTEIN) HOMOLOG 2 (DROSOPHILA)                                          | NM_025303    |
| STCH     | RIKEN CDNA B230217N24 GENE                                                                    | NM_030201    |
| STK25    | SERINE/THREONINE KINASE 25 (YEAST)                                                            | NM_021537    |
| STX1B1   | SYNTAXIN 1B1                                                                                  | NM_024414    |
| STX1B2   | SYNTAXIN 1B2                                                                                  | NM_024414    |

|          |                                                                   |              |
|----------|-------------------------------------------------------------------|--------------|
| STX4A    | SYNTAXIN 4A (PLACENTAL)                                           | NM_009294    |
| STX7     | SYNTAXIN 7                                                        | NM_016797    |
| SULF1    | SULFATASE 1                                                       | NM_172294    |
| SUMF1    | SULFATASE MODIFYING FACTOR 1                                      | NM_145937    |
| SYT3     | SYNAPTOTAGMIN III                                                 | NM_016663    |
| TAAR9    | TRACE AMINE RECEPTOR 3                                            | NM_001010831 |
| TAF13    | RIKEN CDNA 1810004N01 GENE                                        | NM_025444    |
| TBC1D1   | TBC1 DOMAIN FAMILY, MEMBER 1                                      | NM_019636    |
| TBC1D10C | TBC1 DOMAIN FAMILY, MEMBER 10C                                    | NM_178650    |
| TBC1D2   | TBC1 DOMAIN FAMILY, MEMBER 2                                      | NM_198664    |
| TCEA3    | TRANSCRIPTION ELONGATION FACTOR A (SII),<br>3                     | NM_011542    |
| TCF15    | TRANSCRIPTION FACTOR 15                                           | NM_009328    |
| TCFCP2L1 | RIKEN CDNA 4932442M07 GENE                                        | NM_023755    |
| TCFEB    | TRANSCRIPTION FACTOR EB                                           | NM_011549    |
| TCN2     | TRANSCOBALAMIN 2                                                  | NM_015749    |
| TECTB    | TECTORIN BETA                                                     | NM_009348    |
| TEX2     | TESTIS EXPRESSED GENE 2                                           | NM_198292    |
| TFPT     | TCF3 (E2A) FUSION PARTNER                                         | NM_023524    |
| TGFBI    | TRANSFORMING GROWTH FACTOR, BETA<br>INDUCED                       | NM_009369    |
| THAP11   | THAP DOMAIN CONTAINING 11                                         | NM_021513    |
| THEX1    | THREE PRIME HISTONE MRNA EXONUCLEASE<br>1                         | NM_026067    |
| THOC6    | WD REPEAT DOMAIN 58                                               | NM_001008425 |
| THRSP    | THYROID HORMONE RESPONSIVE SPOT14<br>HOMOLOG (RATTUS)             | NM_009381    |
| TIMM13   | TRANSLOCASE OF INNER MITOCHONDRIAL<br>MEMBRANE 13 HOMOLOG (YEAST) | NM_013895    |
| TLL2     | TOLLOID-LIKE 2                                                    | NM_011904    |
| TM2D3    | TM2 DOMAIN CONTAINING 3                                           | NM_026795    |
| TM9SF3   | RIKEN CDNA 1810073M23 GENE                                        | NM_133352    |
| TMBIM4   | TRANSMEMBRANE BAX INHIBITOR MOTIF<br>CONTAINING 4                 | NM_026617    |
| TMCO4    | RANSMEMBRANE AND COILED-COIL DOMAINS<br>4                         | NM_029857    |
| TMEM115  | TRANSMEMBRANE PROTEIN 115                                         | NM_019704    |
| TMEM129  | TRANSMEMBRANE PROTEIN 129                                         | NM_026698    |
| TMEM131  | DNA SEGMENT, CHR 1, BRIGHAM & WOMEN'S<br>GENETICS 0491 EXPRESSED  | NM_018872    |
| TMEM134  | RIKEN CDNA 2410001H17 GENE                                        | NM_025889    |
| TMEM147  | RIKEN CDNA 5033425B17 GENE                                        | NM_027215    |
| TMEM158  | RIKEN CDNA 2310037P21 GENE                                        | NM_001002267 |
| TMEM17   | TRANSMEMBRANE PROTEIN 17                                          | NM_153596    |
| TMEM189  | EXPRESSED SEQUENCE AI256840                                       | NM_145538    |
| TMEM30A  | TRANSMEMBRANE PROTEIN 30A                                         | NM_133718    |
| TMEM39A  | TRANSMEMBRANE PROTEIN 39A                                         | NM_026407    |
| TMEM46   | TRANSMEMBRANE PROTEIN 46                                          | NM_145463    |
| TMEM48   | TRANSMEMBRANE PROTEIN 48                                          | NM_028355    |
| TMEM88   | TRANSMEMBRANE PROTEIN 88                                          | NM_025915    |
| TMTC1    | CDNA SEQUENCE BC023818                                            | NM_198967    |
| TMTC3    | TRANSMEMBRANE AND TETRATRICOPEPTIDE<br>REPEAT CONTAINING 3        | NM_001033332 |
| TNFAIP1  | TUMOR NECROSIS FACTOR, ALPHA-INDUCED<br>PROTEIN 1 (ENDOTHELIAL)   | NM_009395    |
| TNFRSF1B | TUMOR NECROSIS FACTOR RECEPTOR<br>SUPERFAMILY, MEMBER 1B          | NM_011610    |
| TNFSF11  | TUMOR NECROSIS FACTOR (LIGAND)<br>SUPERFAMILY, MEMBER 11          | NM_011613    |



|          |                                                                           |              |
|----------|---------------------------------------------------------------------------|--------------|
| TNNT1    | TROPONIN T1, SKELETAL, SLOW                                               | NM_011618    |
| TOM1L2   | TARGET OF MYB1-LIKE 2 (CHICKEN)                                           | NM_001039092 |
| TOMM20   | TRANSLOCASE OF OUTER MITOCHONDRIAL<br>MEMBRANE 20 HOMOLOG (YEAST)         | NM_024214    |
| TOR1AIP1 | TORSIN A INTERACTING PROTEIN 1                                            | NM_144791    |
| TOR2A    | TORSIN FAMILY 2, MEMBER A                                                 | NM_152800    |
| TOR3A    | TORSIN FAMILY 3, MEMBER A                                                 | NM_023141    |
| TPR      | TRANSLOCATED PROMOTER REGION                                              | NM_133780    |
| TPT1     | TUMOR PROTEIN, TRANSLATIONALLY-<br>CONTROLLED 1                           | NM_009429    |
| TRAK2    | TRAFFICKING PROTEIN, KINESIN BINDING 2                                    | NM_172406    |
| TRH      | THYROTROPIN RELEASING HORMONE                                             | NM_009426    |
| TRIM9    | RIKEN CDNA C030048G07 GENE                                                | NM_053167    |
| TSPYL1   | TESTIS-SPECIFIC PROTEIN, Y-ENCODED-LIKE 1                                 | NM_009433    |
| TTC35    | RIKEN CDNA 4921531G14 GENE                                                | NM_025736    |
| TTYH1    | TWEETY HOMOLOG 1 (DROSOPHILA)                                             | NM_021324    |
| TUFT1    | TUFTELIN 1                                                                | NM_011656    |
| TXNDC12  | THIOREDOXIN DOMAIN CONTAINING 12<br>(ENDOPLASMIC RETICULUM)               | NM_025334    |
| TYRP1    | TYROSINASE-RELATED PROTEIN 1                                              | NM_031202    |
| UACA     | UVEAL AUTOANTIGEN WITH COILED-COIL<br>DOMAINS AND ANKYRIN REPEATS         | NM_028283    |
| UBC      | UBIQUITIN C                                                               | NM_019639    |
| UBE2F    | UBIQUITIN-CONJUGATING ENZYME E2F<br>(PUTATIVE)                            | NM_026454    |
| UBE2V1   | UBIQUITIN-CONJUGATING ENZYME E2 VARIANT<br>1                              | NM_023230    |
| UBQLN4   | UBIQUILIN 4                                                               | NM_033526    |
| UBR2     | RIKEN CDNA E130209G04 GENE                                                | NM_146078    |
| UNG      | URACIL DNA GLYCOSYLASE                                                    | NM_011677    |
| UNK      | ZINC FINGER CCCH TYPE CONTAINING 5                                        | NM_172569    |
| USP5     | UBIQUITIN SPECIFIC PEPTIDASE 5<br>(ISOPEPTIDASE T)                        | NM_013700    |
| USP9Y    | UBIQUITIN SPECIFIC PEPTIDASE 9, Y<br>CHROMOSOME                           | NM_148943    |
| UST      | URONYL-2-SULFOTRANSFERASE                                                 | NM_177387    |
| UTP14B   | UTP14, U3 SMALL NUCLEOLAR<br>RIBONUCLEOPROTEIN, HOMOLOG B (YEAST)         | NM_001001981 |
| VAV2     | VAV2 ONCOGENE                                                             | NM_009500    |
| VPS72    | VACUOLAR PROTEIN SORTING 72 (YEAST)                                       | NM_009336    |
| WDR18    | WD REPEAT DOMAIN 18                                                       | NM_175450    |
| WDR27    | WD REPEAT DOMAIN 27                                                       | NM_175173    |
| WDR60    | RIKEN CDNA D430033N04 GENE                                                | NM_146039    |
| WDR74    | WD REPEAT DOMAIN 74                                                       | NM_134139    |
| WNT10B   | WINGLESS RELATED MMTV INTEGRATION SITE<br>10B                             | NM_011718    |
| WNT4     | WINGLESS-RELATED MMTV INTEGRATION SITE<br>4                               | NM_009523    |
| WNT8B    | WINGLESS RELATED MMTV INTEGRATION SITE<br>8B                              | NM_011720    |
| XKR9     | X KELL BLOOD GROUP PRECURSOR RELATED<br>FAMILY MEMBER 9 HOMOLOG           | NM_001011873 |
| XRCC1    | X-RAY REPAIR COMPLEMENTING DEFECTIVE<br>REPAIR IN CHINESE HAMSTER CELLS 1 | NM_009532    |
| YIF1B    | YIP1 INTERACTING FACTOR HOMOLOG B (S.<br>CEREVISIAE)                      | NM_029887    |
| YIPF1    | YIP1 DOMAIN FAMILY, MEMBER 1                                              | NM_145550    |
| YPEL4    | YIPPEE-LIKE 4 (DROSOPHILA)                                                | NM_001005342 |
| ZBTB40   | ZINC FINGER AND BTB DOMAIN CONTAINING 40                                  | NM_198248    |

|         |                                              |              |
|---------|----------------------------------------------|--------------|
| ZBTB7B  | VZINC FINGER AND BTB DOMAIN CONTAINING<br>7B | NM_009565    |
| ZBTB7C  | ZINC FINGER AND BTB DOMAIN CONTAINING<br>7C  | NM_145356    |
| ZDHH5   | ZINC FINGER, DHHC DOMAIN CONTAINING 5        | NM_144887    |
| ZFAND2A | ZINC FINGER, AN1-TYPE DOMAIN 2A              | NM_133349    |
| ZFP106  | ZINC FINGER PROTEIN 106                      | NM_011743    |
| ZFP260  | ZINC FINGER PROTEIN 63                       | NM_011981    |
| ZFP289  | ZINC FINGER PROTEIN 289                      | NM_023854    |
| ZFP295  | ZINC FINGER PROTEIN 295                      | NM_175428    |
| ZFP341  | ZINC FINGER PROTEIN 341                      | NM_199304    |
| ZFP36   | ZINC FINGER PROTEIN 36                       | NM_011756    |
| ZFP364  | ZINC FINGER PROTEIN 364                      | NM_026406    |
| ZFP46   | ZINC FINGER PROTEIN 46                       | NM_009557    |
| ZFP462  | ZINC FINGER PROTEIN 462                      | NM_172867    |
| ZFP566  | ZINC FINGER PROTEIN 566                      | NM_152814    |
| ZFP575  | ZINC FINGER PROTEIN 575                      | NM_001033205 |
| ZFP704  | GLUCOCORTICOID INDUCED GENE 1                | NM_133218    |
| ZFP748  | RIKEN CDNA 2610014M12 GENE                   | NM_183145    |
| ZFP84   | ZINC FINGER PROTEIN 84                       | NM_023750    |
| ZFY1    | ZINC FINGER PROTEIN 1, Y LINKED              | NM_009571    |
| ZFY2    | ZINC FINGER PROTEIN 2, Y LINKED              | NM_009571    |
| ZFYVE20 | ZINC FINGER, FYVE DOMAIN CONTAINING 20       | NM_030081    |
| ZFYVE28 | ZINC FINGER, FYVE DOMAIN CONTAINING 28       | NM_001015039 |
| ZKSCAN6 | ZINC FINGER PROTEIN 535                      | NM_026107    |
| ZZZ3    | ZINC FINGER, ZZ DOMAIN CONTAINING 3          | NM_198416    |
