# Supplementary material
Source: PubMed Central journal article supplement (PMC2728968)
Supplement: 0904246106_ST4_PDF.pdf [file 0904246106_ST4_PDF.pdf]

Table S4. Oligonucleotides and Primers used

| qPCR primers for ChIP-Seq validation |                                                                   |                                                                              |
|--------------------------------------|-------------------------------------------------------------------|------------------------------------------------------------------------------|
| Symbol                               | Forward primers                                                   | Reverse primers                                                              |
| <b>SIRT6</b>                         | 5'-GGAAGTCCCTCCCATTGTCT                                           | 5'-TGAATTATGCAGCAGGGTTG                                                      |
| <b>RBL2</b>                          | 5'-CCGGCCGAGACTACATTTC                                            | 5'-GCAGCCTGTCCTGCTACTGT                                                      |
| <b>Rmnd1</b>                         | 5'-TGGCCAGGGTCAGAACAT                                             | 5'-GAACCTCTGCGAAACACAC                                                       |
| <b>LPIN1</b>                         | 5'-GCCCCACGTAATTCATTGTC                                           | 5'-TGTGGGCAGAGTGTGAGAAG                                                      |
| <b>GSK3A</b>                         | 5'-CTGGCTAATGTCACCCGACT                                           | 5'-TGGATGCTGCTCAGTATTGG                                                      |
| <b>CDIPT</b>                         | 5'-AAAGGCGTTAGGGTGGAACT                                           | 5'-TGGGAAGAGGTGGCTAGAGA                                                      |
| <b>UBE2F</b>                         | 5'-GGCCGACTAGTTGACCTGTG                                           | 5'-ACCGCAGTGGGCACTTTA                                                        |
| <b>CDK5</b>                          | 5'-GGACACGCGACTACAAAGT                                            | 5'-GAGAGGCCCTTTTCTGGAAG                                                      |
| <b>SCARB1</b>                        | 5'-AAAGGGTGAGGTTTCATCTGC                                          | 5'-GTGTCCTTGCCAGGAGAACA                                                      |
| <b>PDK1</b>                          | 5'-CTTGGGGACCTGGTGTCTT                                            | 5'-TGCTCTCGGTGAAAACACTG                                                      |
| Manual ChIP primers                  |                                                                   |                                                                              |
| <b>LDLR</b>                          | 5'-GAACTTCCCCTGCTGC                                               | 5'-CACGCCAGAG TCATTTC                                                        |
| <b>ACC2</b>                          | 5'-GCAGGTAAGTAAGTGTGCTG                                           | 5'-GCCACCAGTTCATTTC TCAG                                                     |
| <b>FAS</b>                           | 5'-GCGCAGCCCCGACGCTCATT                                           | 5'-CGGCGCTATTTAAACCGCGG                                                      |
| <b>L32</b>                           | 5'-ACATTTGCCCTGAATGTGGT                                           | 5'-ATCCTCTTGCCCTGACC TT                                                      |
| EMSA Oligos                          |                                                                   |                                                                              |
| <b>LDLR</b>                          | 5'-TTTGAAAATCACCCCACTGCAA<br>ACTCCTCCCCTGCTA                      | 5'-TAGCAGGGGAGGAGTTTGC<br>AGTGGGGTGATTTTCAA                                  |
| <b>NS-Negative Control</b>           | 5'-AGGCAGAACAGAGCTCGGAGGA<br>AAGTCGGCATTTCGCT                     | 5'-AGAGCAGATGCCGACTTTTCCTC<br>CGAGCTCTGTTCTGC                                |
| <b>SRE1 New motif</b>                | 5'-CGGGTGTCG <b>ACTACATTTCCC</b><br>GGAAGGAAC                     | 5'-CCACAGCT <b>GATGTAAGGG</b><br>CCTTCCTTGCC                                 |
| <b>SRE1 New motif mutant</b>         | 5'-CGGGTGTCG TGCAGCACT <b>CCC</b><br>GGAAGGAAC                    | 5'-CACAGC ACGTCGT <b>GAGGG</b><br>CCTTCCTTGCC                                |
| Primers for 3xSRE1 cloning           |                                                                   |                                                                              |
| <b>3xSRE1</b>                        | 5'-CTGACTACATGTCCCTGACTACATG<br>TCCCTGACTACAGTCCCATCGCCG<br>CCCCG | 5'-CTAGCCGGGGCGGCGATGGGACAT<br>GTAGTCAGGGACATGTAGTCAGGGAC<br>ATGTAGTCA GGTAC |
| <b>Mutant 3xSRE1</b>                 | 5'-CTGCAGCACTCCCTGCAGCAC<br>TCCCTGCAGCACTCCCATCGCCG<br>CCCCG      | 5'-CTAGCCGGGGCGGCGATGGGAGT<br>GCTGCAGGGAGTGCTGCAGGGAGTG<br>CTGCA GGTAC       |
